# Supplementary material for: Mechanistic insight into the kinetic fragmentation of Norpinonic Acid in the gas phase: An experimental and DFT study
Source: Copernicus journal article supplement (doi:10.5194/egusphere-2024-679), 2024-03-07
Supplement: Supplementary file 1 [file egusphere-2024-679-supplement.pdf]

## Supplementary Information

### **Mechanistic insight into the kinetic fragmentation of Norpinonic Acid in the gas phase: An experimental and DFT study**

Izabela Kurzydym<sup>1,3</sup>, Agata Błaziak<sup>2</sup>, Kinga Podgórnaiak<sup>1,3</sup>, Karol Kułacz<sup>1,3</sup>, Kacper Błaziak<sup>\*,1,3</sup>

<sup>1</sup>Faculty of Chemistry, University of Warsaw, ul. Pasteura 1, 01-224 Warsaw, Poland

<sup>2</sup>Institute of Physical Chemistry, Polish Academy of Sciences, Warsaw 01-224, Poland

<sup>3</sup>Biological and Chemical Research Center, University of Warsaw, ul. Żwirki i Wigury 101, 01-224 Warsaw, Poland

*Correspondence to:* Kacper Błaziak (kblaziak@chem.uw.edu.pl)

## Table of contents

|      |                                                                                     |    |
|------|-------------------------------------------------------------------------------------|----|
| 1.   | Synthesis of investigated compound .....                                            | 3  |
| 1.1. | Synthesis protocol .....                                                            | 3  |
| 1.2  | Copies of <sup>1</sup> H and <sup>13</sup> C NMR spectra of isolated compound ..... | 3  |
| 2.   | Experimental procedures .....                                                       | 4  |
| 2.1. | Breakdown Curves .....                                                              | 4  |
| 2.2. | Extrapolation Procedure.....                                                        | 4  |
| 2.3. | Bimolecular reaction .....                                                          | 4  |
| 3.   | Experimental results .....                                                          | 4  |
| 4.   | Computed data for norpinonic acid .....                                             | 36 |
| 5.   | Geometries .....                                                                    | 40 |

## 1. Synthesis of investigated compound

### 1.1. Synthesis protocol

The commercially available (1S)-(-)-verbenone (CAS Registry No. 1196-01-6,  $\geq 94\%$ , Sigma-Aldrich) was used as starting material. The protocol for the synthesis of norpinonic acid covered one step - the oxidative cleavage of the double C=C bond using  $\text{RuCl}_3 \times \text{H}_2\text{O}$  (CAS Registry No. 14898-67-0, Sigma-Aldrich,  $\geq 99.98\%$ ). Other chemicals used in cis-norpinonic acid synthesis were as follows: sodium periodate (CAS Registry No. 7790-28-5, Sigma-Aldrich,  $\geq 99.8\%$ ), carbon tetrachloride (CAS Registry No. 56-23-5, Sigma-Aldrich,  $\geq 99.5\%$ ), acetonitrile (CAS Registry No. 75-05-8, POCH,  $\geq 99.9\%$ ), hexane (CAS Registry No. 110-54-3, POCH,  $\geq 99.9\%$ ), ethyl acetate (CAS Registry No. 60-29-7, POCH,  $\geq 99.9\%$ ), magnesium sulfate (CAS Registry No. 7487-88-9, POCH,  $\geq 98.5\%$ ).

To the stirred solution of (1S)-(-)-verbenone (2.5 mL, 16 mmol) in 2:2:3 carbon tetrachloride-acetonitrile-water (130 mL), catalytic  $\text{RuCl}_3$  hydrate (120 mg) and  $\text{NaIO}_4$  (13.4 g, 63 mmol) were added. The resulting mixture was stirred overnight at the room temperature, then diethyl ether (100 mL) was added and stirring for the next 5 min. Then mixture was extracted with diethyl ether ( $3 \times 100$  mL). The combined organic extracts were dried ( $\text{MgSO}_4$ ) and concentrated under reduced pressure. Norpinonic acid was isolated as white crystals after crystallization from diethyl ether (yield: 80%).

The structural identification of the final product based on IR, ESI-HR-MS,  $^1\text{H}$ ,  $^{13}\text{C}$  and 2D NMR analytical spectra proved the presence of cis-norpinonic acid stereoisomeric form.

### 1.2 Copies of $^1\text{H}$ and $^{13}\text{C}$ NMR spectra of isolated compound

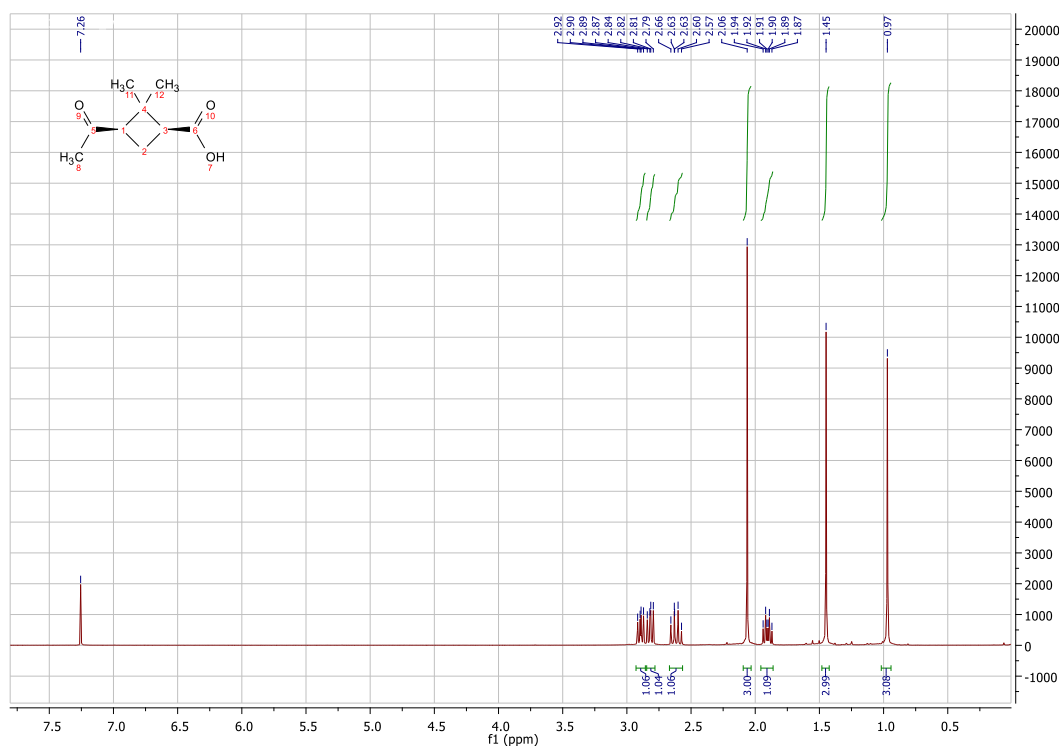

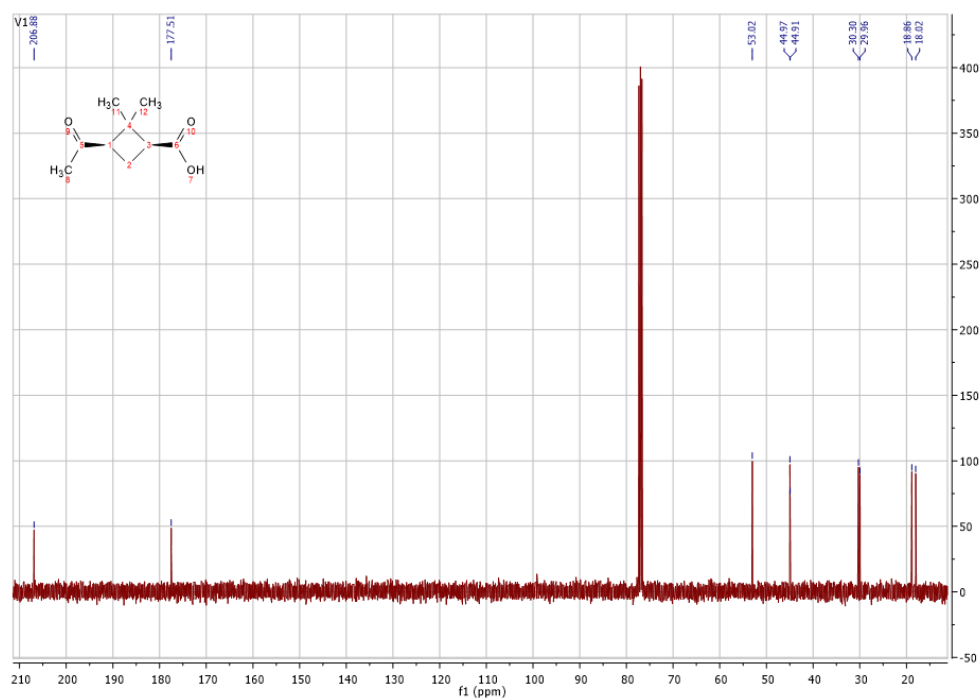

## 2. Experimental procedures

### 2.1. Breakdown Curves

Collision spectra were recorded by varying the collision energy in incremental steps. Collision mass spectra were recorded with an energy resolution of 8–30 eV in the lab frame and 2–10 minutes of collection time at each step. Creation of the total breakdown curves was performed using absolute peak heights. Breakdown curves at five different argon pressures are presented in.

### 2.2. Extrapolation Procedure

To determine the onset/threshold energies (at each gas pressure) to enable a comparison of the energetics of the observed processes, we used a simple extrapolation procedure. By performing a linear fit of the approximately linearly rising section of the breakdown curve, we define the onset energy at each gas pressure by calculation of the energy (X value) at zero intensity (Y = 0). To compare the experimental and theoretical energy values, we opted also for gas pressure extrapolation. We used the energies taken from extrapolation at five different gas pressures to define the onset energy by calculation of the energy (Y value) at zero gas pressure (X = 0). Summaries are presented in Tables.

### 2.3. Bimolecular reaction

To perform the gas-phase reactions, we introduce neutral reagent vapors into the collision cell by attaching a flask filled with each reagent to the gas inlet system. The results of these experiments for reaction between methyl thiocyanate ( $\text{CH}_3\text{SCN}$ ) or dimethyl disulfide ( $\text{CH}_3\text{SSCH}_3$ ) and all ions are presented in Figures.

## 3. Experimental results

### 3.1. Fragment ion mass spectra

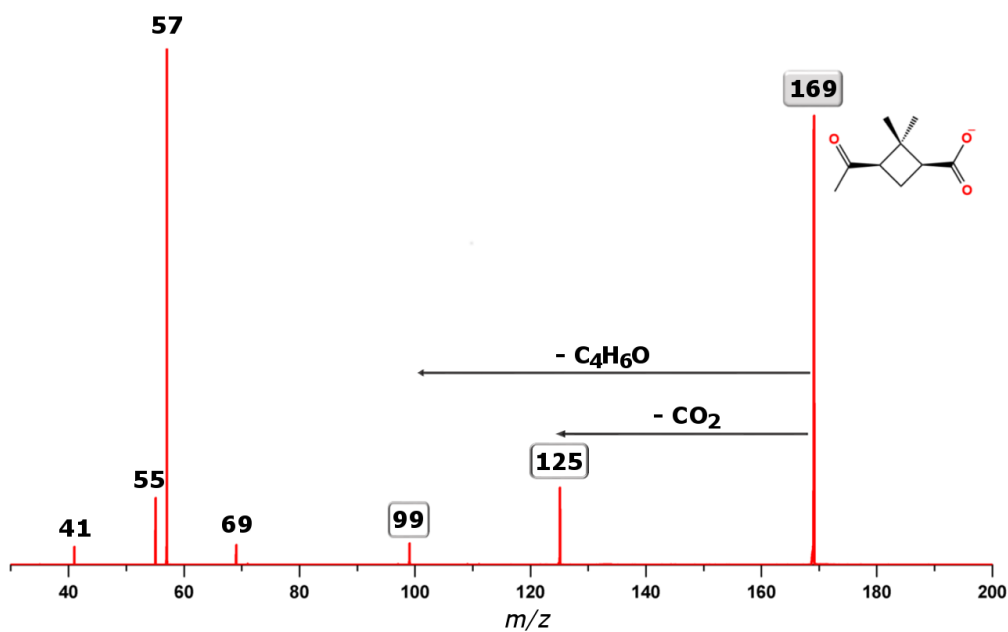

**Figure S1.** Fragment ion mass spectrum of  $C_9H_{13}O_3^-$  ( $m/z$  169) recorded with a ToF voltage of 3kV, taken at a collision energy of 3.8 eV (CM) with argon collision gas at nominal pressure of  $3.54 \times 10^{-4}$  mBar.

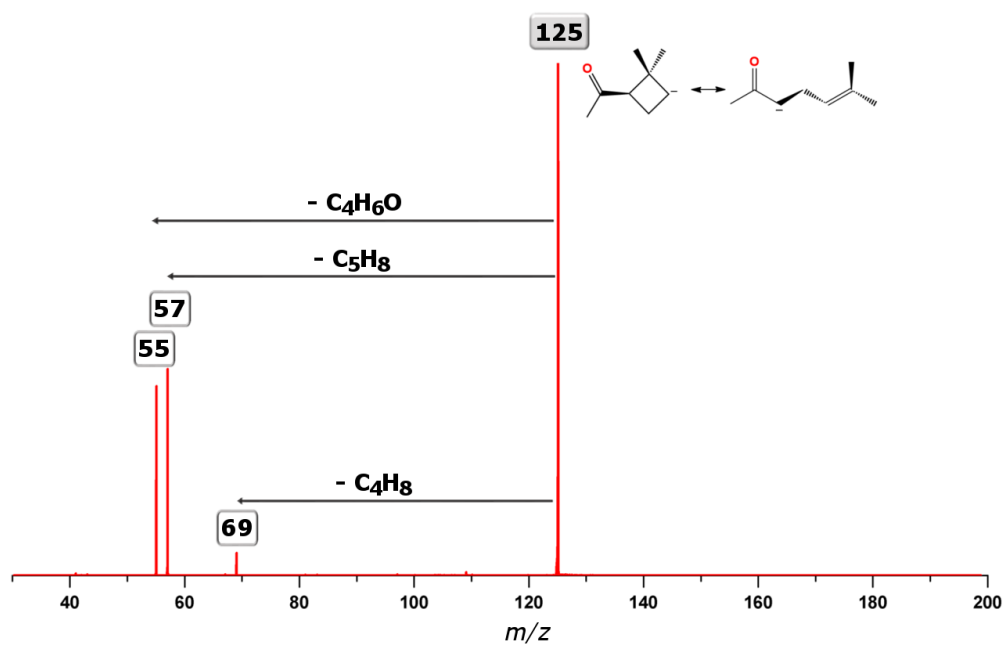

**Figure S2.** Fragment ion mass spectrum of  $C_8H_{13}O^-$  ( $m/z$  125) recorded with a ToF voltage of 3kV, taken at a collision energy of 4.1 eV (CM) with argon collision gas at nominal pressure of  $3.54 \times 10^{-4}$  mBar.

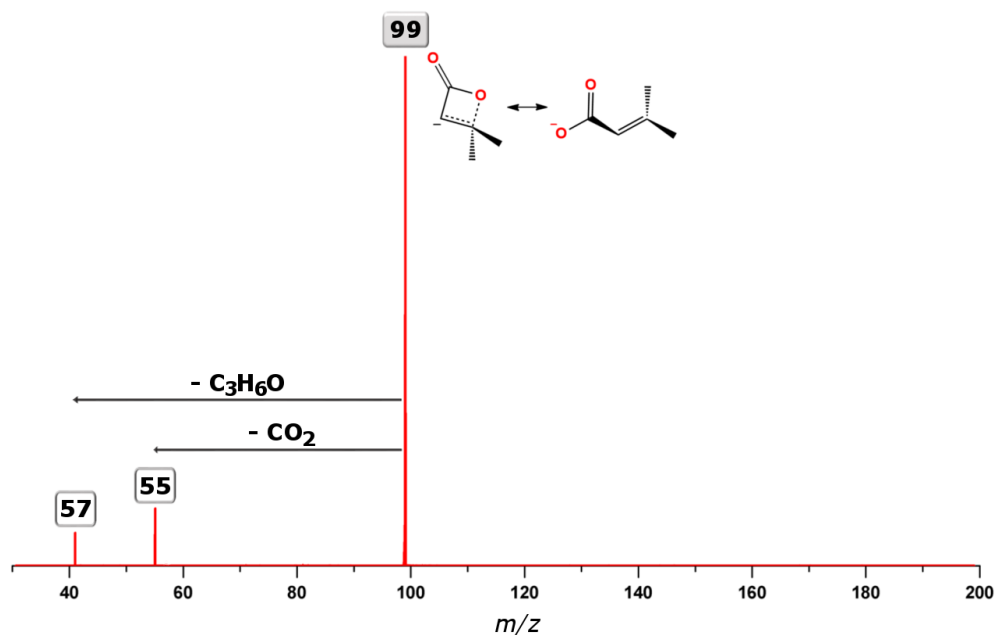

**Figure S3.** Fragment ion mass spectrum of  $C_5H_7O_2^-$  ( $m/z$  99) recorded with a ToF voltage of 3kV, taken at a collision energy of 4.3 eV (CM) with argon collision gas at nominal pressure of  $3.54 \times 10^{-4}$  mBar.

### 3.2. Breakdown curves and extrapolation results

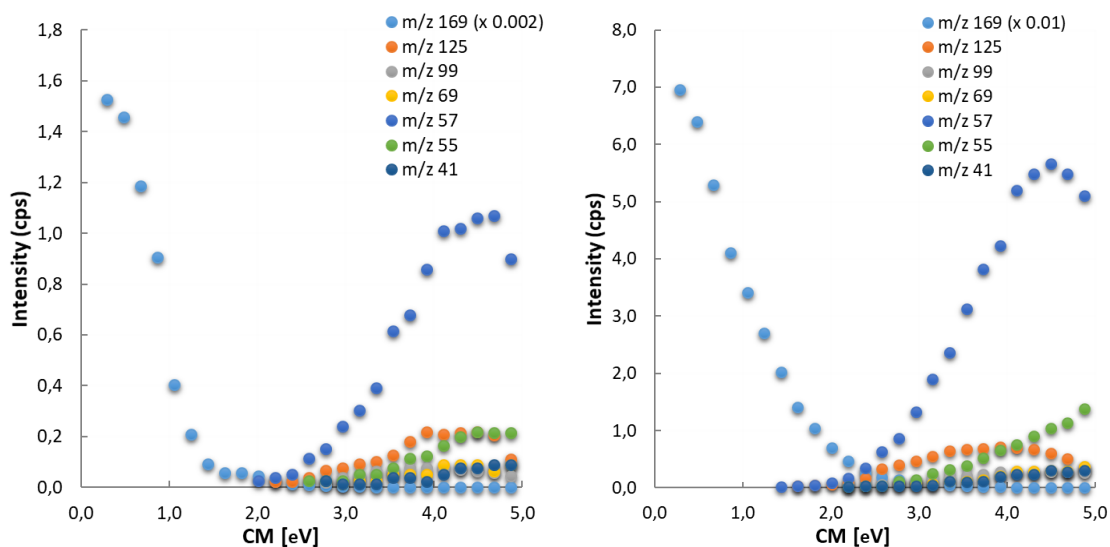

**Figure S4.** Breakdown curves for  $C_9H_{13}O_3^-$  ( $m/z$  169) recorded at an argon collision gas pressure of  $1.06 \times 10^{-4}$  mbar (left) and  $2.08 \times 10^{-4}$  mbar (right). The intensity of the  $m/z$  169 anion have been multiplied by a scaling factor for readability.

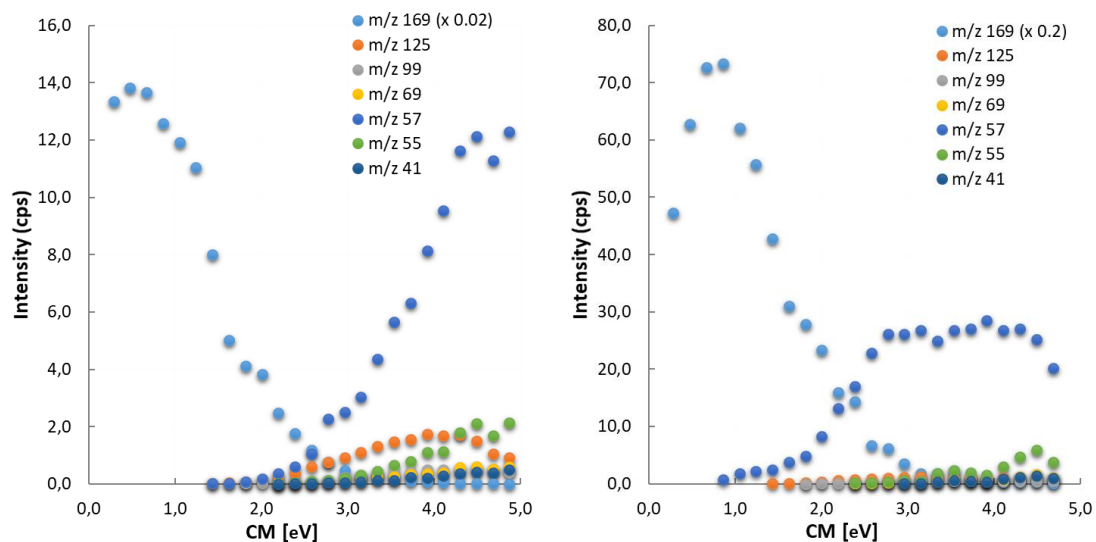

**Figure S5.** Breakdown curves for  $C_9H_{13}O_3^-$  ( $m/z$  169) recorded at an argon collision gas pressure of  $3.04 \times 10^{-4}$  mbar (left) and  $4.18 \times 10^{-4}$  mbar (right). The intensity of the  $m/z$  169 anion have been multiplied by a scaling factor for readability.

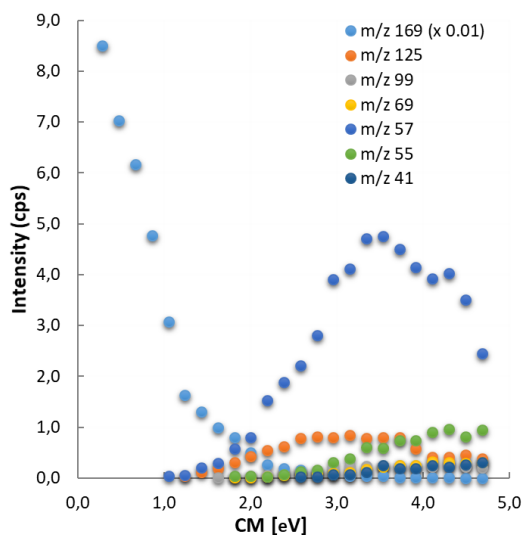

**Figure S6.** Breakdown curve for  $C_9H_{13}O_3^-$  ( $m/z$  169) recorded at an argon collision gas pressure of  $5.09 \times 10^{-4}$  mbar. The intensity of the  $m/z$  169 anion have been multiplied by a scaling factor for readability.

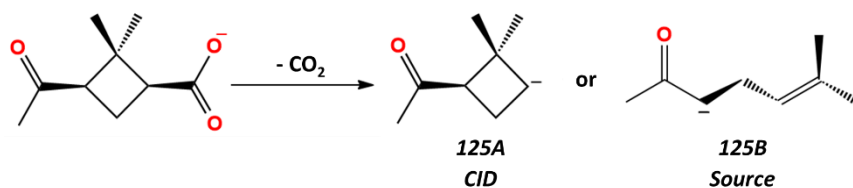

**Figure S7.** Decarboxylation of  $\text{C}_9\text{H}_{13}\text{O}_3^-$  ( $m/z$  169) ion leading to the formation of  $\text{C}_8\text{H}_{13}\text{O}^-$  ( $m/z$  125) ion. *Comment: From computational and experimental study is known that cyclic structure of  $m/z$  125 (125A) is formed in collision-induced dissociation (CID) experiment, while linear structure of  $m/z$  125 (125B) is formed in an ion source during ionization process.*

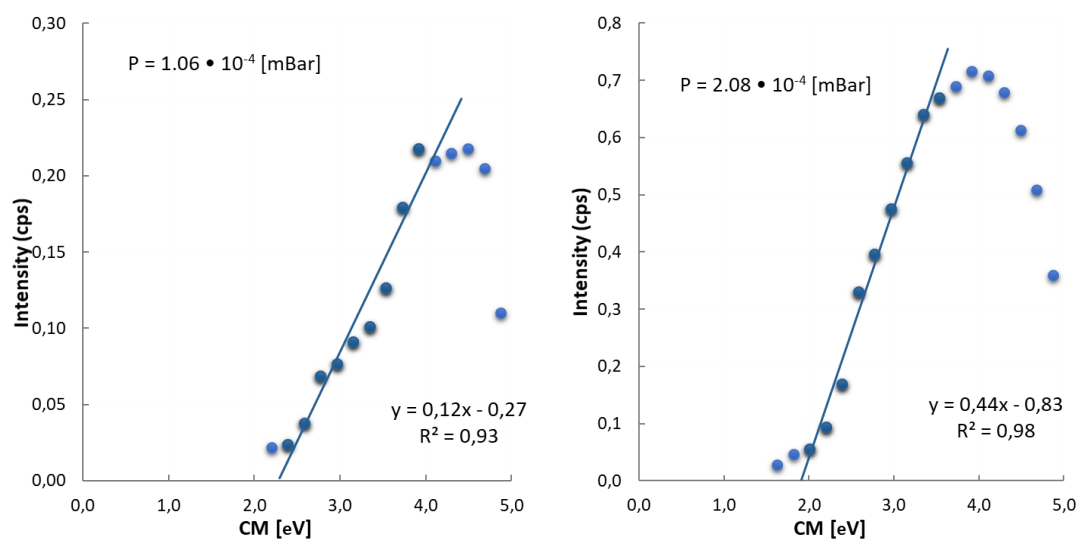

**Figure S8.** Extrapolation procedure for the decarboxylation of  $\text{C}_9\text{H}_{13}\text{O}_3^-$  ( $m/z$  169) recorded at an argon collision gas pressure of  $1.06 \times 10^{-4}$  mbar (left) and  $2.08 \times 10^{-4}$  mbar (right).

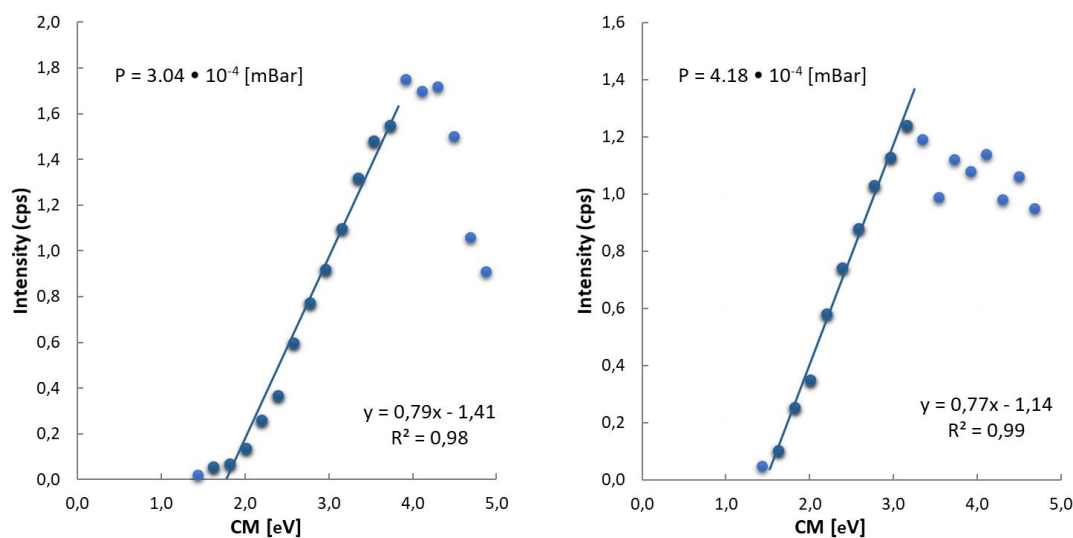

**Figure S9.** Extrapolation procedure for the decarboxylation of  $\text{C}_9\text{H}_{13}\text{O}_3^-$  ( $m/z$  169) recorded at an argon collision gas pressure of  $3.04 \times 10^{-4}$  mbar (left) and  $4.18 \times 10^{-4}$  mbar (right).



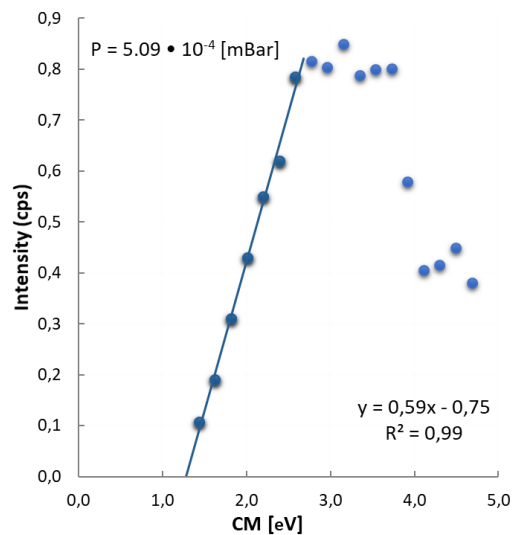

**Figure S10.** Extrapolation procedure for the decarboxylation of  $C_9H_{13}O_3^-$  ( $m/z$  169) recorded at an argon collision gas pressure of  $5.09 \times 10^{-4}$  mbar.

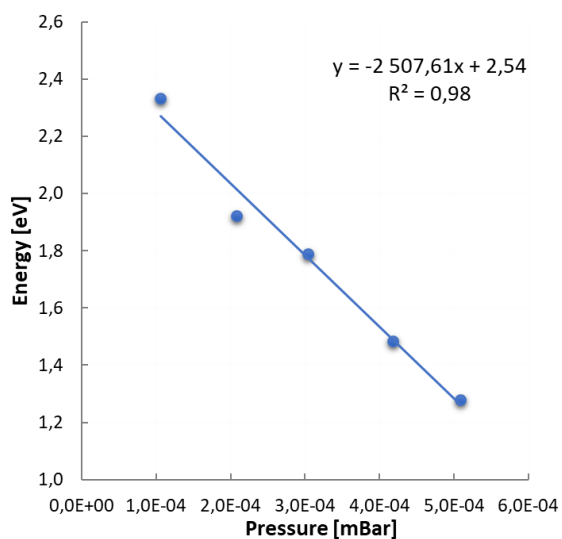

**Figure S11.** Extrapolation procedure for the decarboxylation of  $C_9H_{13}O_3^-$  ( $m/z$  169) at a gas pressure of 0 mbar.

**Table S1.** Summary of the values from the extrapolation procedure for decarboxylation of  $C_9H_{13}O_3^-$  ( $m/z$  169).

| Pressure [mBar]:              | Intercept | Slope | X at Y=0 [eV] | [kJ/mol] |
|-------------------------------|-----------|-------|---------------|----------|
| $1.06 \cdot 10^{-4}$          | -0.27     | 0.12  | 2,33          | 225      |
| $2.08 \cdot 10^{-4}$          | -0.83     | 0.44  | 1,92          | 186      |
| $3.04 \cdot 10^{-4}$          | -1.41     | 0.79  | 1,79          | 173      |
| $4.18 \cdot 10^{-4}$          | -1.12     | 0.77  | 1,49          | 143      |
| $5.09 \cdot 10^{-4}$          | -0.75     | 0.59  | 1,28          | 124      |
| Extrapolated pressure [mBar]: | Intercept | Slope | Y at X=0 [eV] | [kJ/mol] |
| 0                             | -2507,61  | 2,54  | 2,54          | 245      |

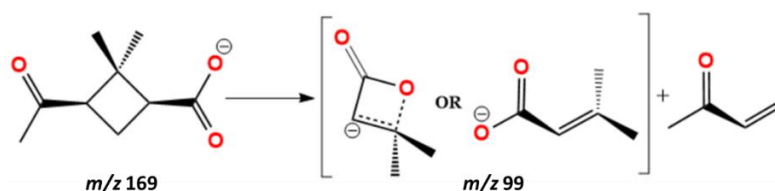

**Figure S12.** Elimination of  $C_4H_6O$  from  $C_9H_{13}O_3^-$  ( $m/z$  169) leading to the formation of  $C_5H_7O_2^-$  ( $m/z$  99) an ion, which can have two possible structure.

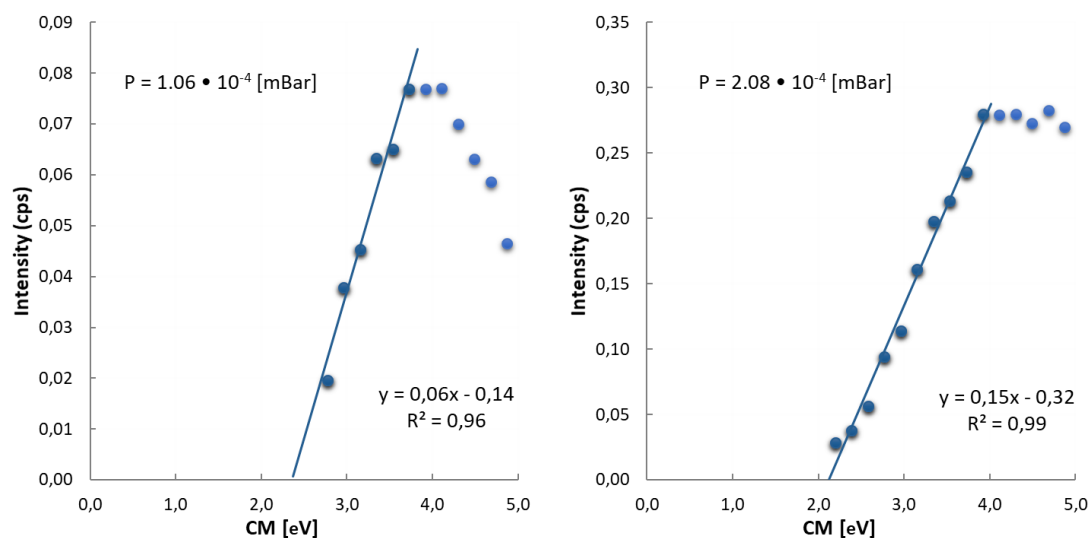

**Figure S13.** Extrapolation procedure for the elimination of  $C_4H_6O$  from  $C_9H_{13}O_3^-$  ( $m/z$  169) recorded at an argon collision gas pressure of  $1.06 \times 10^{-4}$  mbar (left) and  $2.08 \times 10^{-4}$  mbar (right).

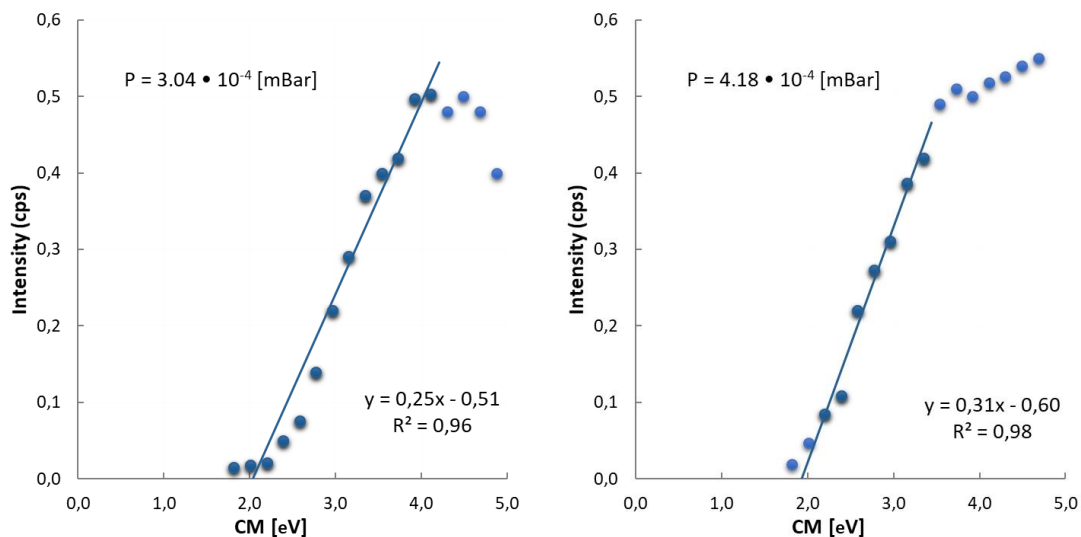

**Figure S14.** Extrapolation procedure for the elimination of  $C_4H_6O$  from  $C_9H_{13}O_3^-$  ( $m/z$  169) recorded at an argon collision gas pressure of  $3.04 \times 10^{-4}$  mbar (left) and  $4.18 \times 10^{-4}$  mbar (right).

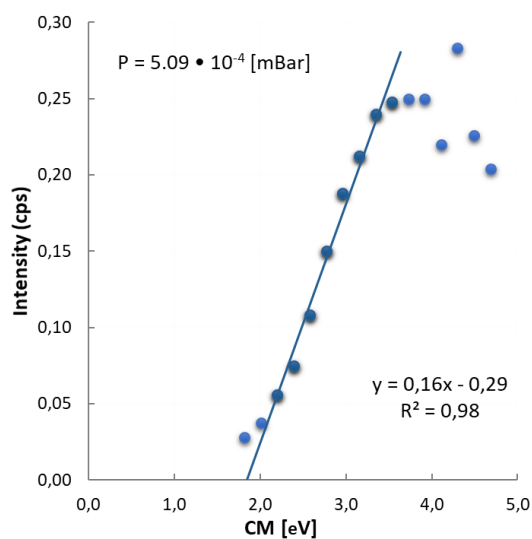

**Figure S15.** Extrapolation procedure for the elimination of  $C_4H_6O$  from  $C_9H_{13}O_3^-$  ( $m/z$  169) recorded at an argon collision gas pressure of  $5.09 \times 10^{-4}$  mbar.

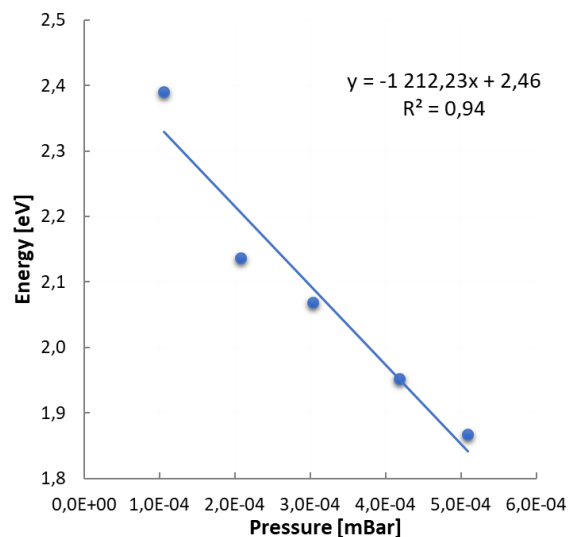

**Figure S16.** Extrapolation procedure for the elimination of  $C_4H_6O$  from  $C_9H_{13}O_3^-$  ( $m/z$  169) at a gas pressure of 0 mbar.

**Table S2.** Summary of the values from the extrapolation procedure for the elimination of  $C_4H_6O$  from  $C_9H_{13}O_3^-$  ( $m/z$  169).

| Pressure [mBar]:              | Intercept | Slope | X at Y=0 [eV] | [kJ/mol] |
|-------------------------------|-----------|-------|---------------|----------|
| $1.06 \cdot 10^{-4}$          | -0.14     | 0.06  | 2,39          | 231      |
| $2.08 \cdot 10^{-4}$          | -0.32     | 0.15  | 2,14          | 206      |
| $3.04 \cdot 10^{-4}$          | -0.51     | 0.25  | 2,07          | 200      |
| $4.18 \cdot 10^{-4}$          | -0.60     | 0.31  | 1,95          | 188      |
| $5.09 \cdot 10^{-4}$          | -0.29     | 0.16  | 1,87          | 180      |
| Extrapolated pressure [mBar]: | Intercept | Slope | Y at X=0 [eV] | [kJ/mol] |
| 0                             | -1212,23  | 2,46  | 2,46          | 237      |

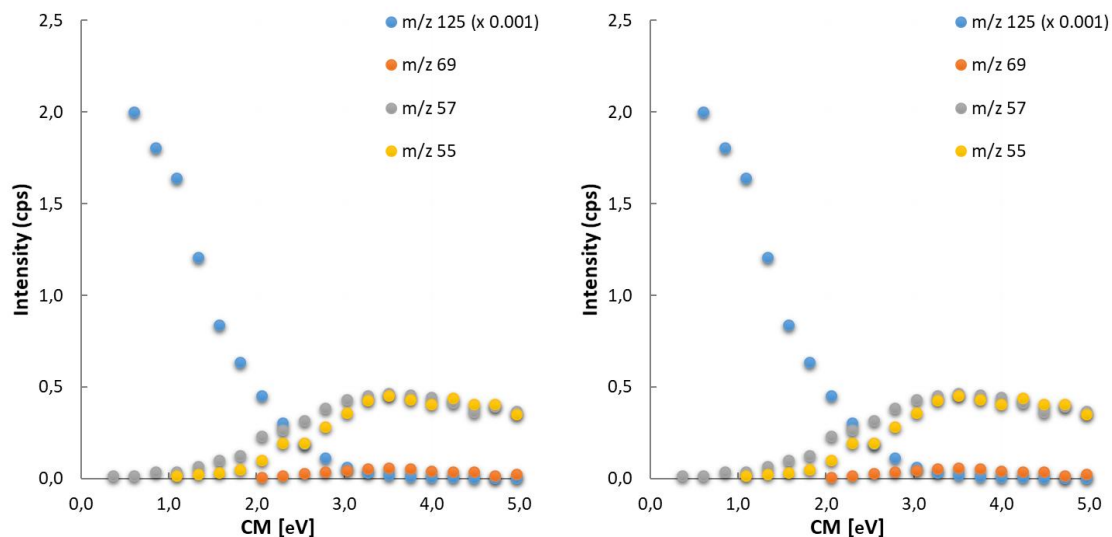

**Figure S17.** Breakdown curves for  $\text{C}_8\text{H}_{13}\text{O}^-$  ( $m/z$  125) recorded at an argon collision gas pressure of  $1.06 \times 10^{-4}$  mbar (left) and  $2.05 \times 10^{-4}$  mbar (right). The intensity of the  $m/z$  125 anion have been multiplied by a scaling factor for readability.

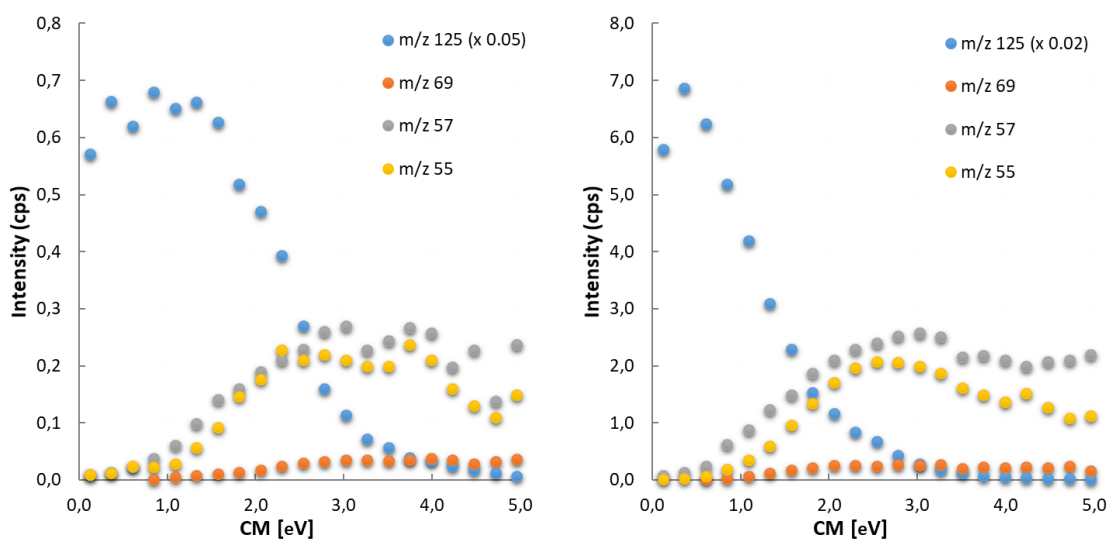

**Figure S18.** Breakdown curves for  $\text{C}_8\text{H}_{13}\text{O}^-$  ( $m/z$  125) recorded at an argon collision gas pressure of  $3.17 \times 10^{-4}$  mbar (left) and  $4.14 \times 10^{-4}$  mbar (right). The intensity of the  $m/z$  125 anion have been multiplied by a scaling factor for readability.

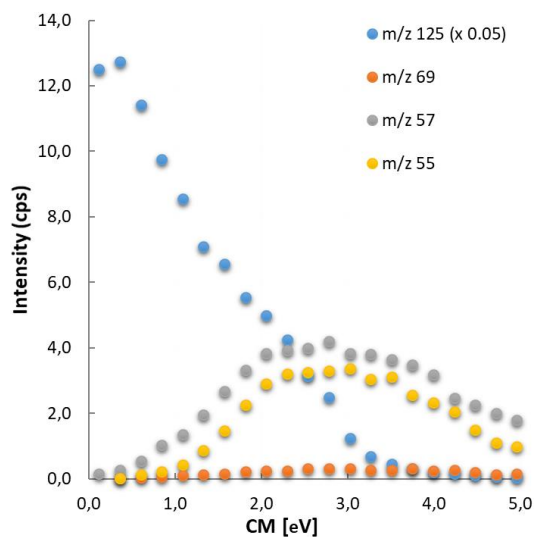

**Figure S19.** Breakdown curve for  $C_8H_{13}O^-$  ( $m/z$  125) recorded at an argon collision gas pressure of  $5.07 \times 10^{-4}$  mbar. The intensity of the  $m/z$  125 anion have been multiplied by a scaling factor for readability.

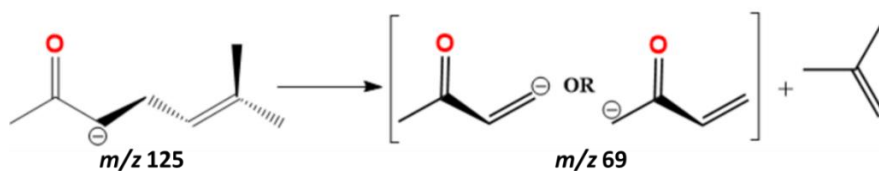

**Figure S20.** Elimination reaction of  $C_4H_8$  from  $C_8H_{13}O^-$  ( $m/z$  125) leading to the formation of  $C_4H_5O^-$  ( $m/z$  69) an ion, which can have two possible structure.

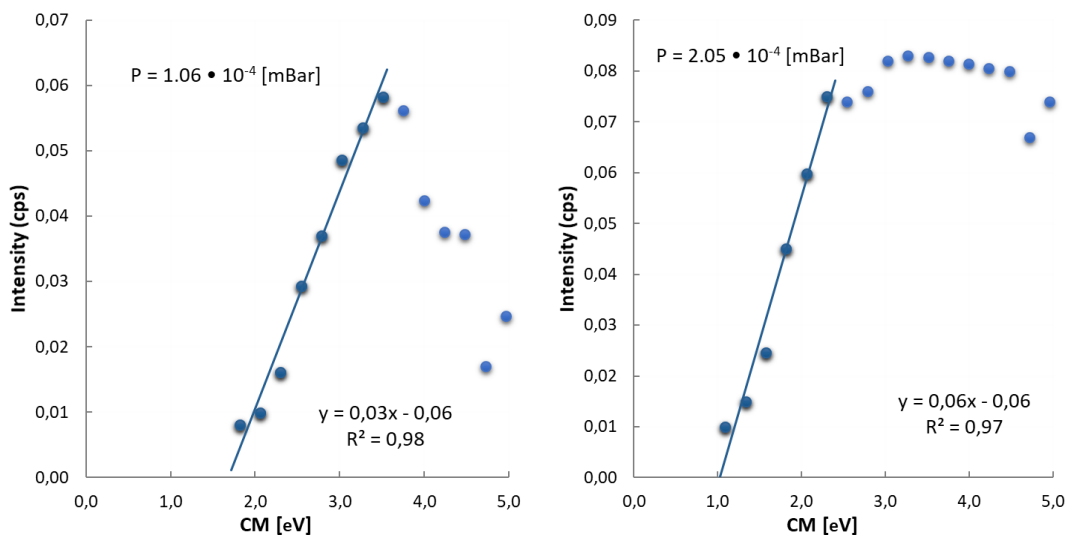

**Figure S21.** Extrapolation procedure for the elimination of  $C_4H_8$  from  $C_8H_{13}O^-$  ( $m/z$  125) recorded at an argon collision gas pressure gas pressure of  $1.06 \times 10^{-4}$  mbar (left) and  $2.05 \times 10^{-4}$  mbar (right).

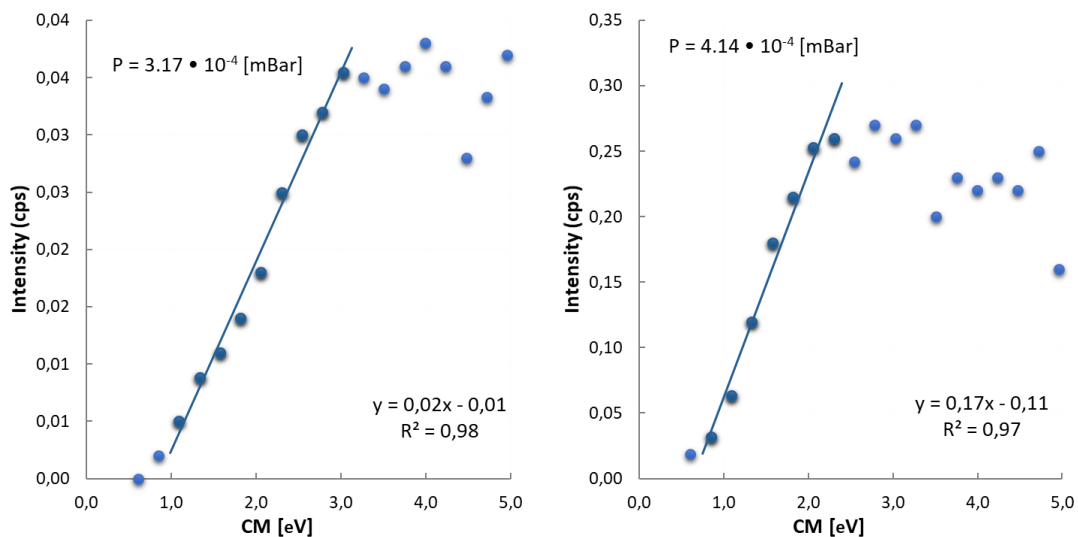

**Figure S22.** Extrapolation procedure for the elimination of  $C_4H_8$  from  $C_8H_{13}O^-$  ( $m/z$  125) recorded at an argon collision gas pressure  $3.17 \times 10^{-4}$  mbar (left) and  $4.14 \times 10^{-4}$  mbar (right).

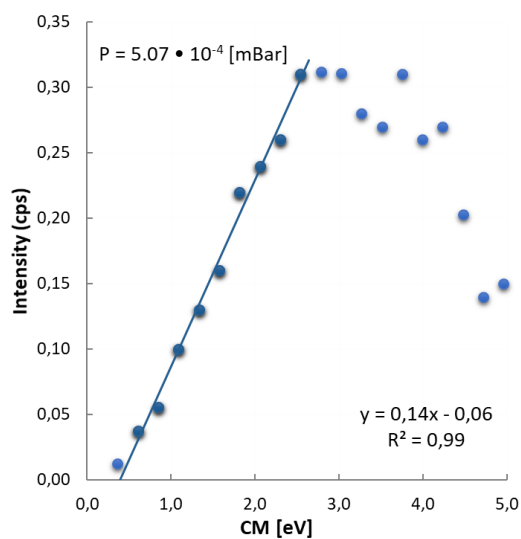

**Figure S23.** Extrapolation procedure the elimination of  $C_4H_8$  from  $C_8H_{13}O^-$  ( $m/z$  125) recorded at an argon collision gas pressure of  $5.07 \times 10^{-4}$  mbar.

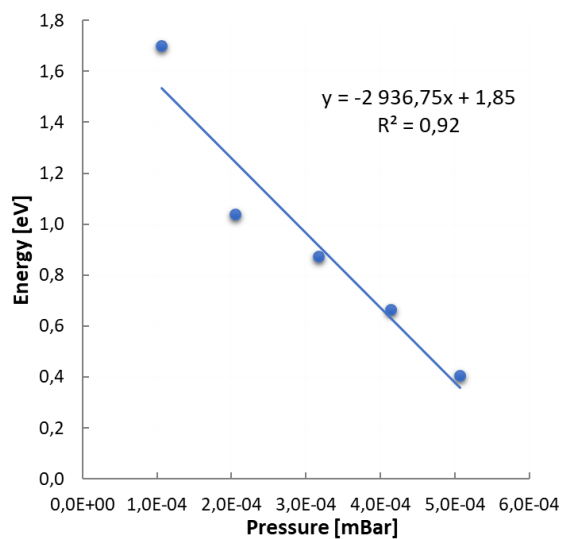

**Figure S24.** Extrapolation procedure for the elimination of  $C_4H_6O$  from  $C_8H_{13}O^-$  ( $m/z$  125) at a gas pressure of 0 mbar.



**Table S3.** Summary of the values from the extrapolation procedure for the elimination of  $C_4H_6O$  from  $C_8H_{13}O^-$  ( $m/z$  125).

| Pressure [mBar]:              | Intercept | Slope | X at Y=0 [eV] | [kJ/mol] |
|-------------------------------|-----------|-------|---------------|----------|
| $1.06 \cdot 10^{-4}$          | -0.06     | 0.03  | 1,70          | 164      |
| $2.05 \cdot 10^{-4}$          | -0.06     | 0.06  | 1,04          | 100      |
| $3.17 \cdot 10^{-4}$          | -0.01     | 0.02  | 0,87          | 84       |
| $4.14 \cdot 10^{-4}$          | -0.11     | 0.17  | 0,66          | 64       |
| $5.07 \cdot 10^{-4}$          | -0.06     | 0.14  | 0,40          | 39       |
| Extrapolated pressure [mBar]: | Intercept | Slope | Y at X=0 [eV] | [kJ/mol] |
| 0                             | -2936,75  | 1,85  | 1,85          | 178      |

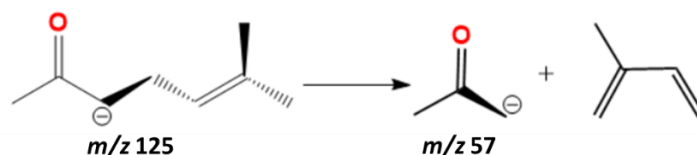

**Figure S25.** Elimination reaction of  $C_5H_8$  from  $C_8H_{13}O^-$  ( $m/z$  125) leading to the formation of  $C_3H_5O^-$  ( $m/z$  57) an ion.

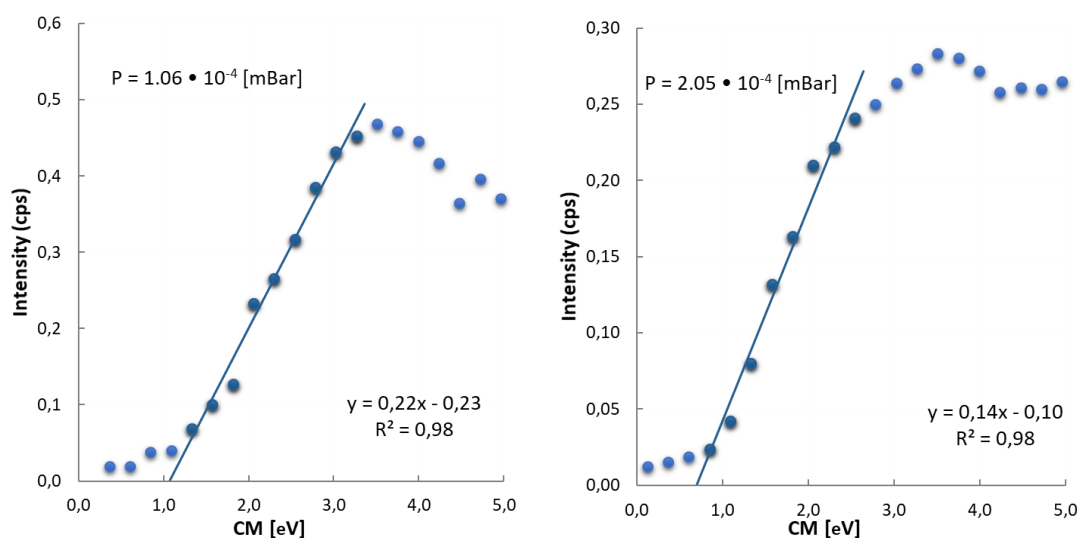

**Figure S26.** Extrapolation procedure for the elimination of  $C_5H_8$  from  $C_8H_{13}O^-$  ( $m/z$  125) recorded at an argon collision gas pressure of  $1.06 \times 10^{-4}$  mbar (left) and  $2.05 \times 10^{-4}$  mbar (right).

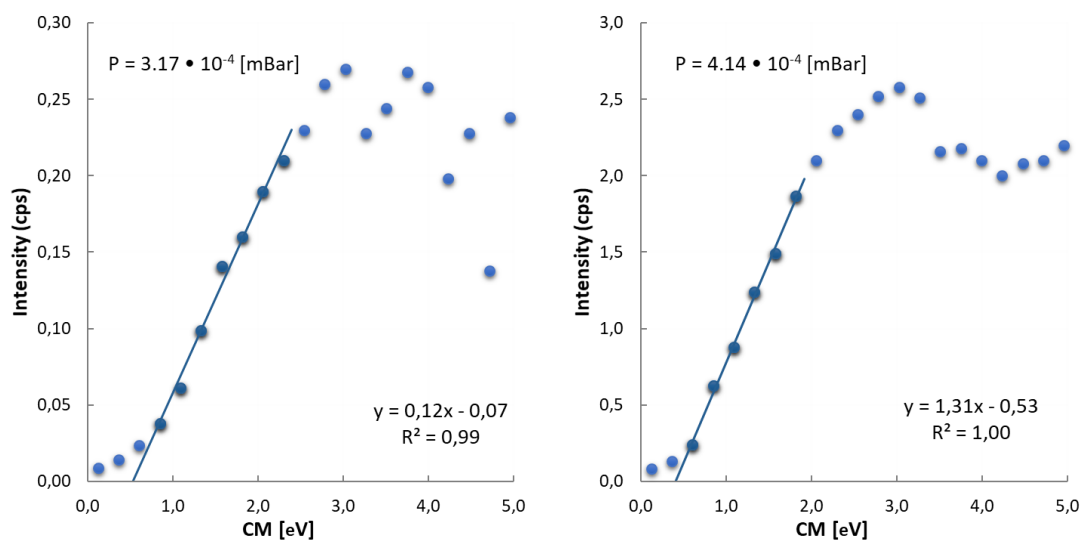

**Figure S27.** Extrapolation procedure for the elimination of  $C_5H_8$  from  $C_8H_{13}O^-$  ( $m/z$  125) recorded at an argon collision gas pressure  $3.17 \times 10^{-4}$  mbar (left) and  $4.14 \times 10^{-4}$  mbar (right).

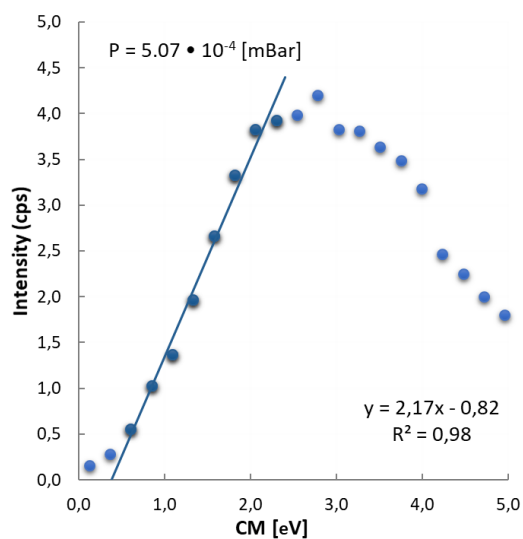

**Figure S28.** Extrapolation procedure the elimination of  $C_5H_8$  from  $C_8H_{13}O^-$  ( $m/z$  125) recorded at an argon collision gas pressure of  $5.07 \times 10^{-4}$  mbar.

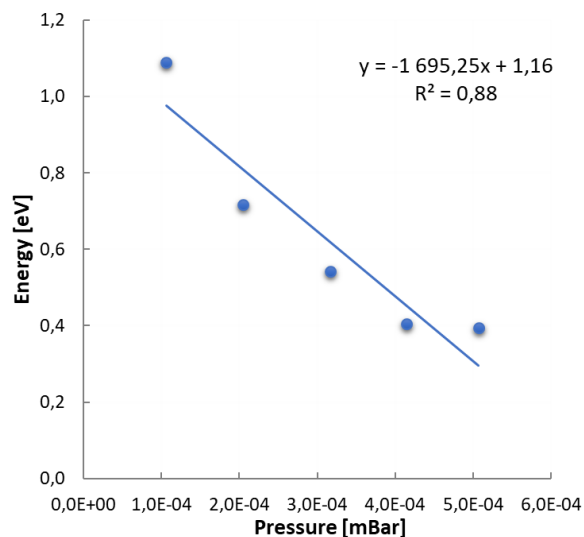

**Figure S29.** Extrapolation procedure for the elimination of  $C_5H_8$  from  $C_8H_{13}O^-$  ( $m/z$  125) at a gas pressure of 0 mbar.

**Table S4.** Summary of the values from the extrapolation procedure for the elimination of  $C_4H_6O$  from  $C_8H_{13}O^-$  ( $m/z$  125).

| Pressure [mBar]:              | Intercept | Slope | X at Y=0 [eV] | [kJ/mol] |
|-------------------------------|-----------|-------|---------------|----------|
| $1.06 \cdot 10^{-4}$          | -0.06     | 0.03  | 1,09          | 105      |
| $2.05 \cdot 10^{-4}$          | -0.06     | 0.06  | 0,72          | 69       |
| $3.17 \cdot 10^{-4}$          | -0.01     | 0.02  | 0,54          | 52       |
| $4.14 \cdot 10^{-4}$          | -0.11     | 0.17  | 0,41          | 39       |
| $5.07 \cdot 10^{-4}$          | -0.06     | 0.14  | 0,39          | 38       |
| Extrapolated pressure [mBar]: | Intercept | Slope | Y at X=0 [eV] | [kJ/mol] |
| 0                             | -1695,25  | 1,16  | 1,16          | 111      |

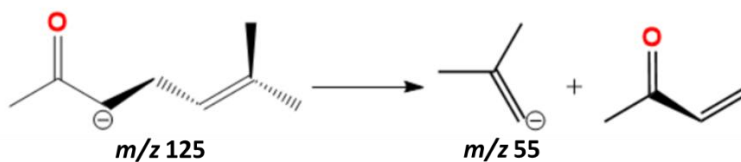

**Figure S30.** Elimination of  $C_4H_6O$  from  $C_8H_{13}O^-$  ( $m/z$  125) leading to the formation of  $C_4H_7^-$  ( $m/z$  55) a ion.

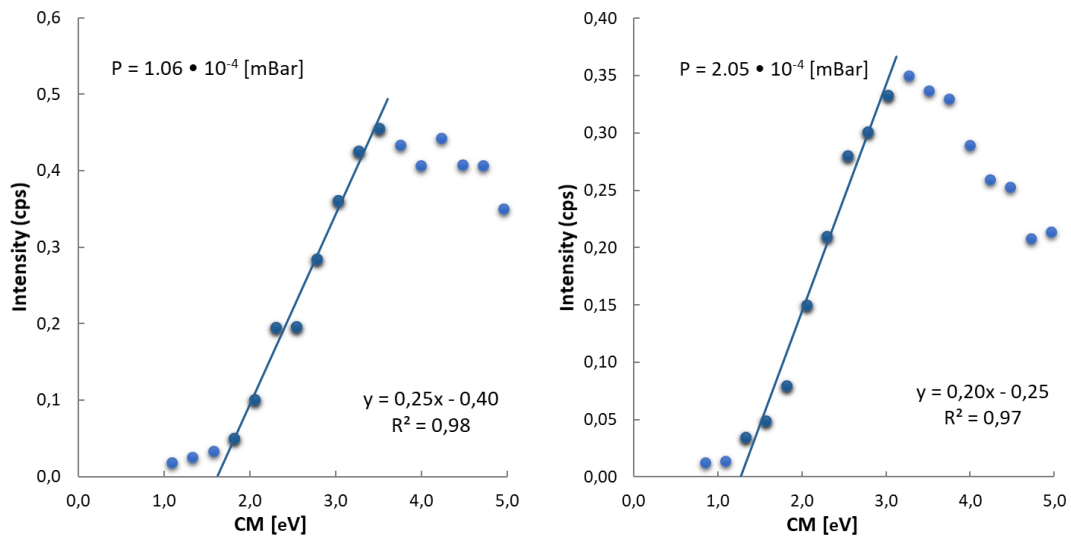

**Figure S31.** Extrapolation procedure for the elimination of  $C_4H_6O$  from  $C_3H_{13}O^-$  ( $m/z$  125) recorded at an argon collision gas pressure of  $1.06 \times 10^{-4}$  mbar (left) and  $2.05 \times 10^{-4}$  mbar (right).

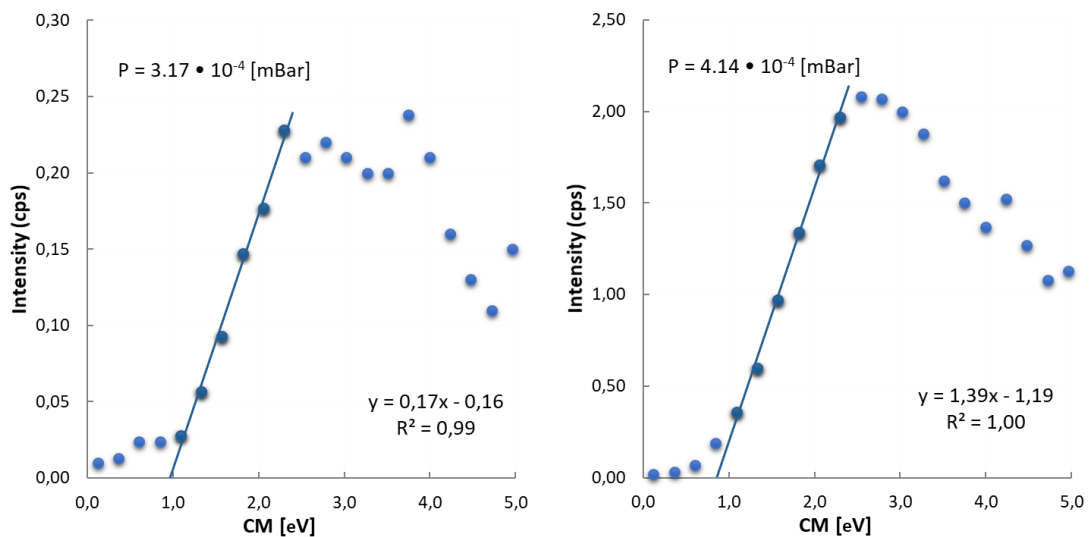

**Figure S32.** Extrapolation procedure for the elimination of  $C_4H_6O$  from  $C_3H_{13}O^-$  ( $m/z$  125) recorded at an argon collision gas pressure  $3.17 \times 10^{-4}$  mbar (left) and  $4.14 \times 10^{-4}$  mbar (right).

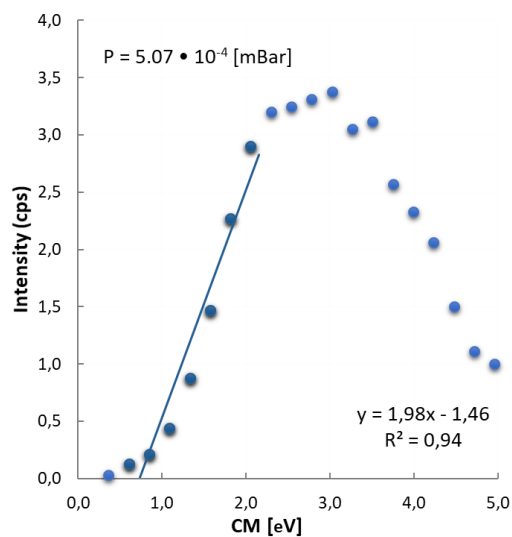

**Figure S33.** Extrapolation procedure the elimination of  $C_4H_6O$  from  $C_8H_{13}O^-$  ( $m/z$  125) recorded at an argon collision gas pressure of  $5.07 \times 10^{-4}$  mbar.

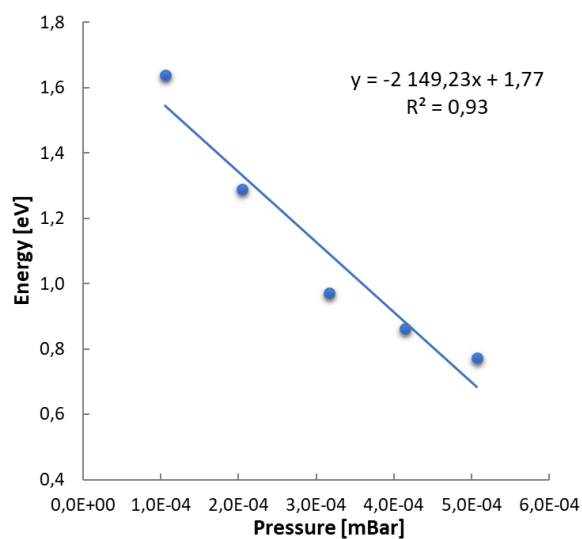

**Figure S34.** Extrapolation procedure for the elimination of  $C_5H_8$  from  $C_8H_{13}O^-$  ( $m/z$  125) at a gas pressure of 0 mbar.

**Table S5.** Summary of the values from the extrapolation procedure for the elimination of  $C_4H_6O$  from  $C_8H_{13}O^-$  ( $m/z$  125).

| Pressure [mBar]:              | Intercept | Slope | X at Y=0 [eV] | [kJ/mol] |
|-------------------------------|-----------|-------|---------------|----------|
| $1.06 \cdot 10^{-4}$          | -0.40     | 0.17  | 1,64          | 158,03   |
| $2.05 \cdot 10^{-4}$          | -0.25     | 0.20  | 1,29          | 124,44   |
| $3.17 \cdot 10^{-4}$          | -0.16     | 0.17  | 0,97          | 93,79    |
| $4.14 \cdot 10^{-4}$          | -1.19     | 1.39  | 0,86          | 83,23    |
| $5.07 \cdot 10^{-4}$          | -1.46     | 1.98  | 0,77          | 74,46    |
| Extrapolated pressure [mBar]: | Intercept | Slope | Y at X=0 [eV] | [kJ/mol] |
| 0                             | -2149,233 | 1,773 | 1,77          | 171      |

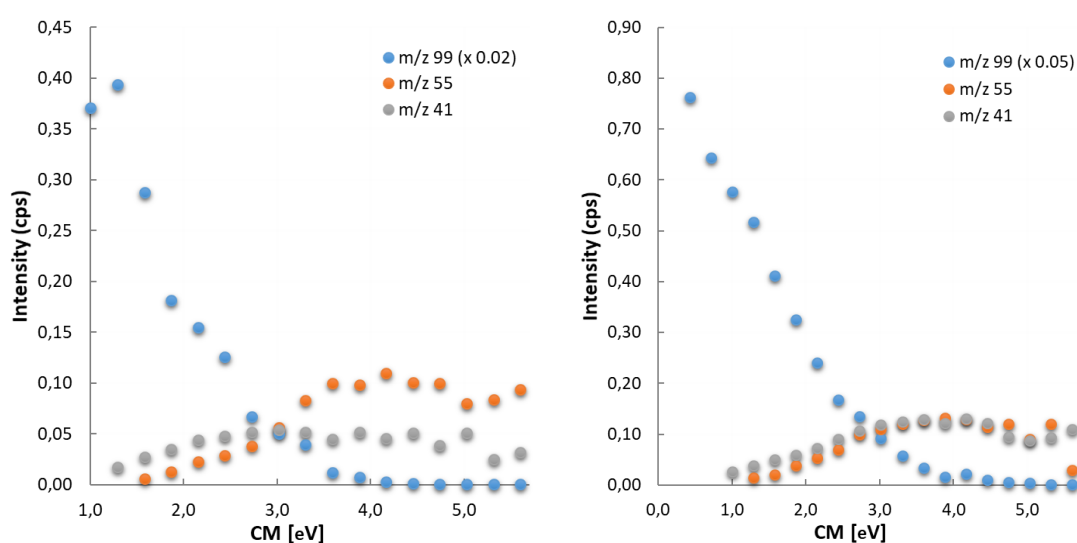

**Figure S35.** Breakdown curves for  $C_5H_7O_2^-$  ( $m/z$  99) recorded at an argon collision gas pressure of  $1.06 \times 10^{-4}$  mbar (left) and  $2.06 \times 10^{-4}$  mbar (right). The intensity of the  $m/z$  99 anion have been multiplied by a scaling factor for readability.

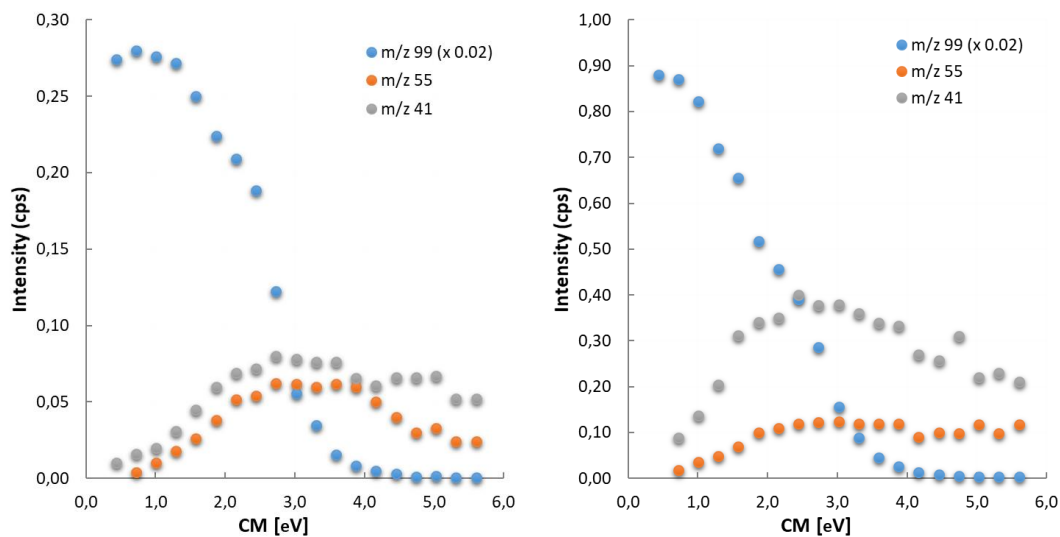

**Figure S36.** Breakdown curves for  $C_5H_7O_2^-$  ( $m/z$  99) recorded at an argon collision gas pressure of  $3.20 \times 10^{-4}$  mbar (left) and  $4.16 \times 10^{-4}$  mbar (right). The intensity of the  $m/z$  99 anion have been multiplied by a scaling factor for readability.

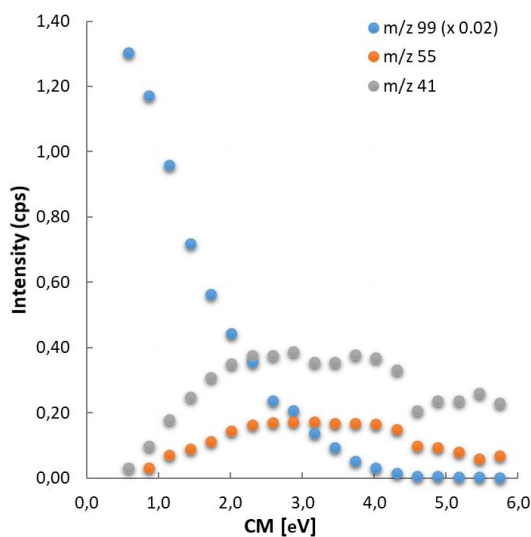

**Figure S37.** Breakdown curve for  $C_5H_7O_2^-$  ( $m/z$  99) recorded at an argon collision gas pressure of  $5.11 \times 10^{-4}$  mbar. The intensity of the  $m/z$  99 anion have been multiplied by a scaling factor for readability.

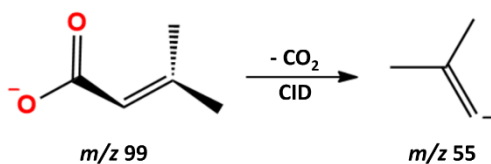

**Figure S38.** Decarboxylation reaction of  $C_5H_7O_2^-$  ( $m/z$  99) leading to the formation of  $C_4H_7^-$  ( $m/z$  55) an ion.

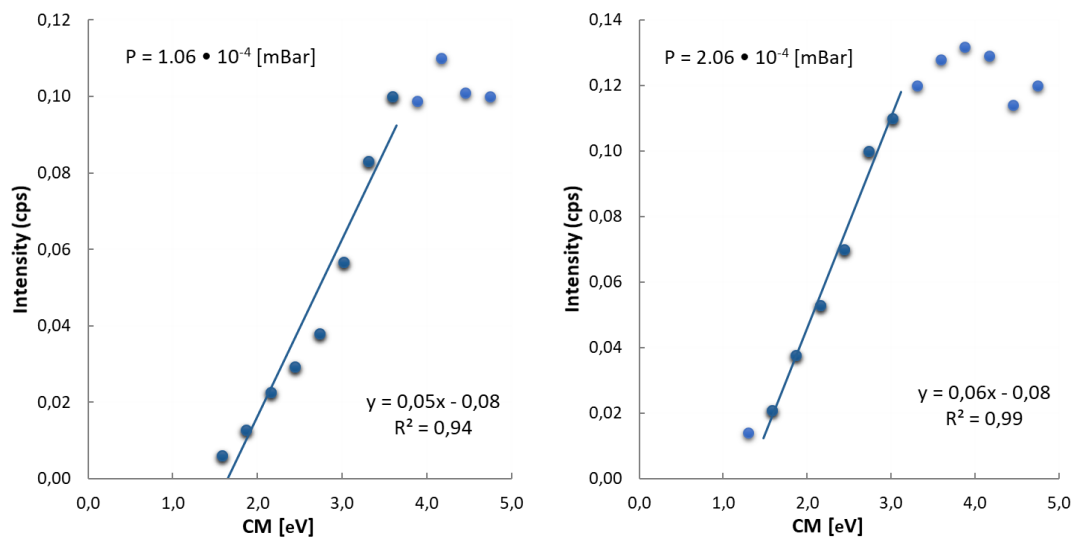

**Figure S39.** Extrapolation procedure for the decarboxylation of  $C_5H_7O_2^-$  ( $m/z$  99) recorded at an argon collision gas pressure of  $1.06 \times 10^{-4}$  mbar (left) and  $2.06 \times 10^{-4}$  mbar (right).

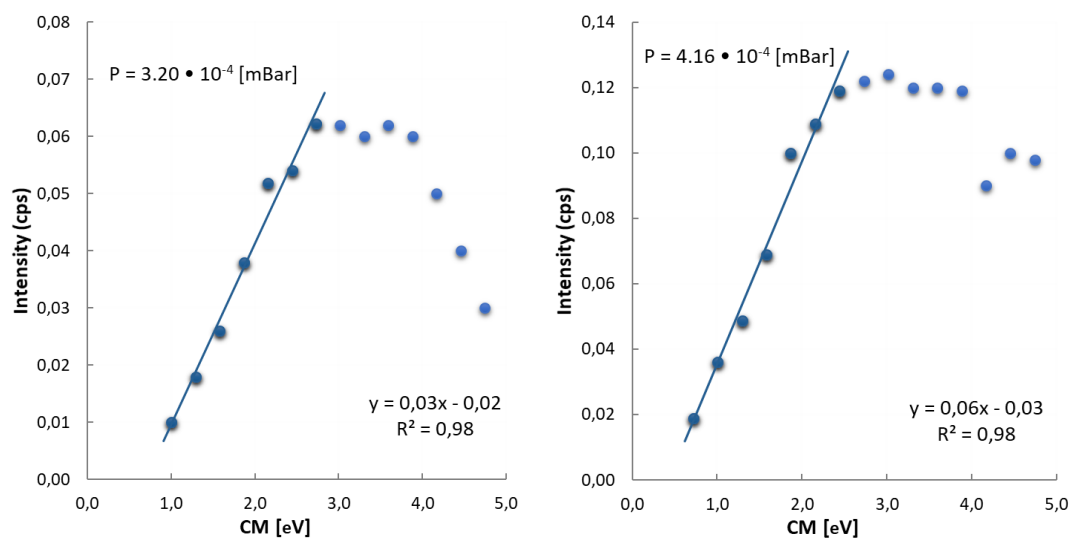

**Figure S40.** Extrapolation procedure for the decarboxylation of  $C_5H_7O_2^-$  ( $m/z$  99) recorded at an argon collision gas pressure of  $3.20 \times 10^{-4}$  mbar (left) and  $4.16 \times 10^{-4}$  mbar (right).



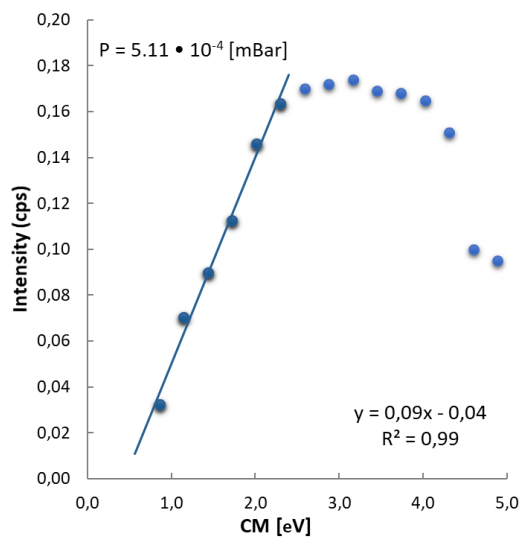

**Figure S41.** Extrapolation procedure for the decarboxylation of  $C_5H_7O_2^-$  ( $m/z$  99) recorded at an argon collision gas pressure of  $5.11 \times 10^{-4}$  mbar.

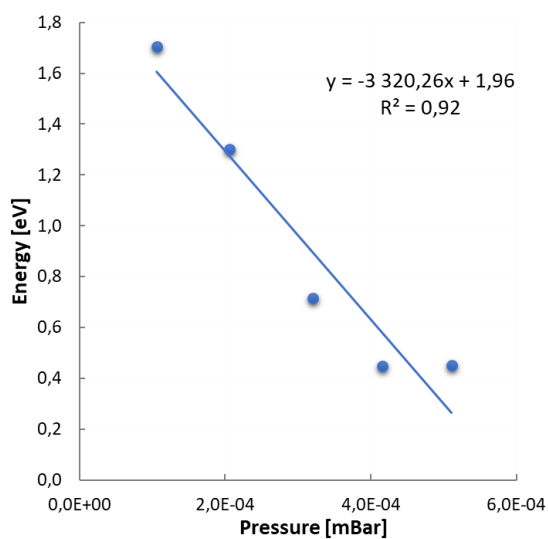

**Figure S42.** Extrapolation procedure for the decarboxylation of  $C_5H_7O_2^-$  ( $m/z$  99) at a gas pressure of 0 mbar.

**Table S6.** Summary of the values from the extrapolation procedure for the decarboxylation of  $C_5H_7O_2^-$  ( $m/z$  99).

| Pressure [mBar]:              | Intercept | Slope | X at Y=0 [eV] | [kJ/mol] |
|-------------------------------|-----------|-------|---------------|----------|
| $1.06 \cdot 10^{-4}$          | -0.27     | 0.12  | 1,70          | 164      |
| $2.06 \cdot 10^{-4}$          | -0.83     | 0.44  | 1,30          | 126      |
| $3.20 \cdot 10^{-4}$          | -1.41     | 0.79  | 0,72          | 69       |
| $4.16 \cdot 10^{-4}$          | -1.12     | 0.77  | 0,45          | 43       |
| $5.11 \cdot 10^{-4}$          | -0.75     | 0.59  | 0,45          | 44       |
| Extrapolated pressure [mBar]: | Intercept | Slope | Y at X=0 [eV] | [kJ/mol] |
| 0                             | -3320,26  | 1,96  | 1,96          | 189      |

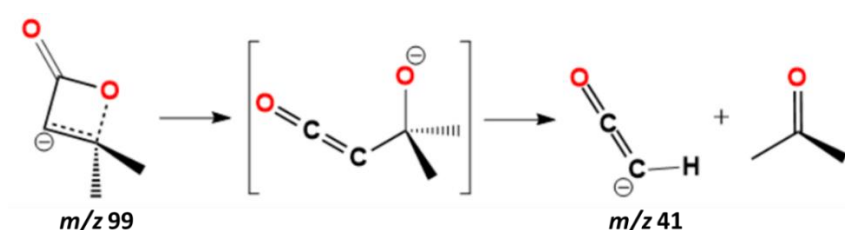

**Figure S43.** Elimination reaction of  $C_3H_6O$  from  $C_5H_7O_2^-$  ( $m/z$  99) leading to the formation of  $C_2HO^-$  ( $m/z$  41) an ion.

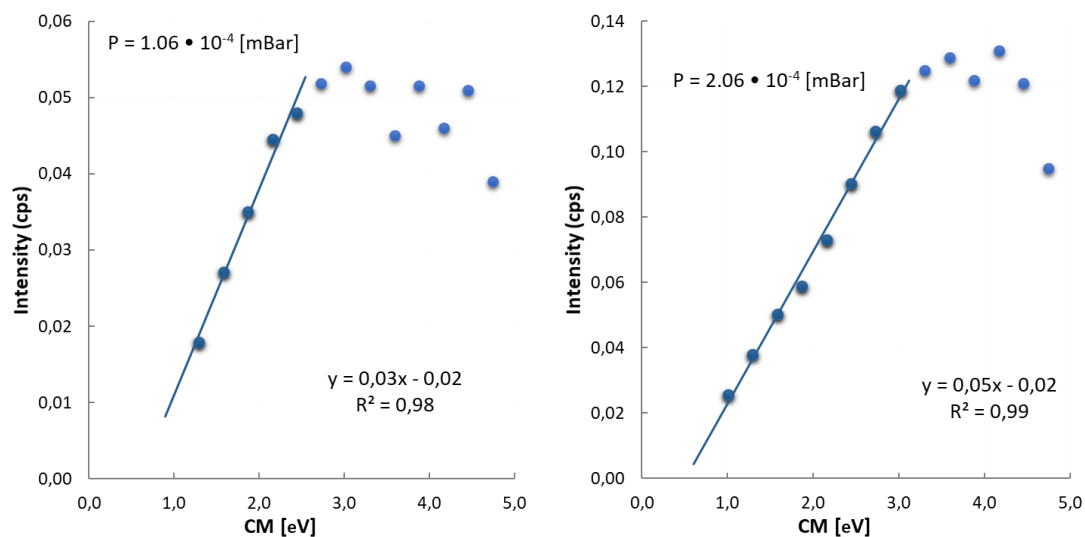

**Figure S44.** Extrapolation procedure for elimination of  $C_3H_6O$  from  $C_5H_7O_2^-$  ( $m/z$  99) recorded at an argon collision gas pressure gas pressure of  $1.06 \times 10^{-4}$  mbar (left) and  $2.06 \times 10^{-4}$  mbar (right).

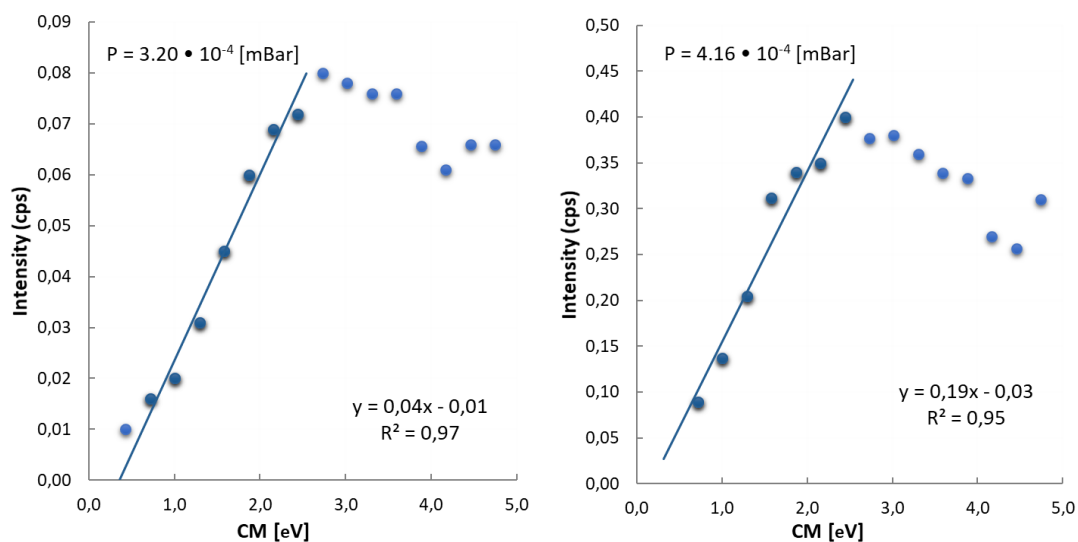

**Figure S45.** Extrapolation procedure for elimination of  $C_3H_6O$  from  $C_5H_7O_2^-$  ( $m/z$  99) recorded at an argon collision gas pressure gas pressure of  $3.20 \times 10^{-4}$  mbar (left) and  $4.16 \times 10^{-4}$  mbar (right).

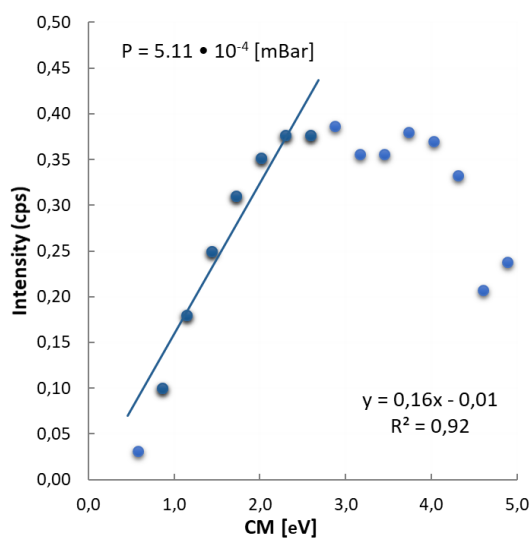

**Figure S46.** Extrapolation procedure for elimination of  $C_3H_6O$  from  $C_5H_7O_2^-$  ( $m/z$  99) recorded at an argon collision gas pressure gas pressure of  $5.11 \times 10^{-4}$  mbar.

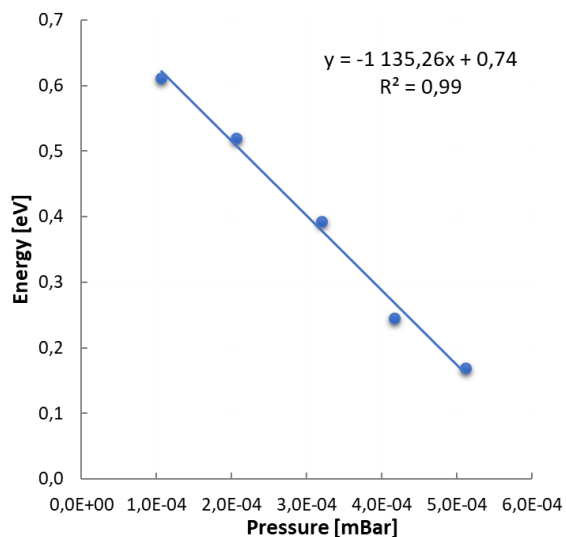

**Figure S47.** Extrapolation procedure for elimination of C<sub>3</sub>H<sub>6</sub>O from C<sub>5</sub>H<sub>7</sub>O<sub>2</sub><sup>-</sup> (*m/z* 99) at a gas pressure of 0 mbar.

**Table S7.** Summary of the values from the extrapolation procedure for elimination of C<sub>3</sub>H<sub>6</sub>O from C<sub>5</sub>H<sub>7</sub>O<sub>2</sub><sup>-</sup> (*m/z* 99).

| Pressure [mBar]:              | Intercept | Slope | X at Y=0 [eV] | [kJ/mol] |
|-------------------------------|-----------|-------|---------------|----------|
| 1.06 · 10 <sup>-4</sup>       | -0.02     | 0.03  | 0.61          | 59       |
| 2.06 · 10 <sup>-4</sup>       | -0.02     | 0.05  | 0.52          | 50       |
| 3.20 · 10 <sup>-4</sup>       | -0.01     | 0.04  | 0.39          | 38       |
| 4.16 · 10 <sup>-4</sup>       | -0.03     | 0.19  | 0.25          | 24       |
| 5.11 · 10 <sup>-4</sup>       | -0.01     | 0.16  | 0.17          | 16       |
| Extrapolated pressure [mBar]: | Intercept | Slope | Y at X=0 [eV] | [kJ/mol] |
| 0                             | -1135,26  | 0,74  | 0,74          | 72       |

### 3.3. Reactions with dimethyl disulfide ( $\text{CH}_3\text{SSCH}_3$ )

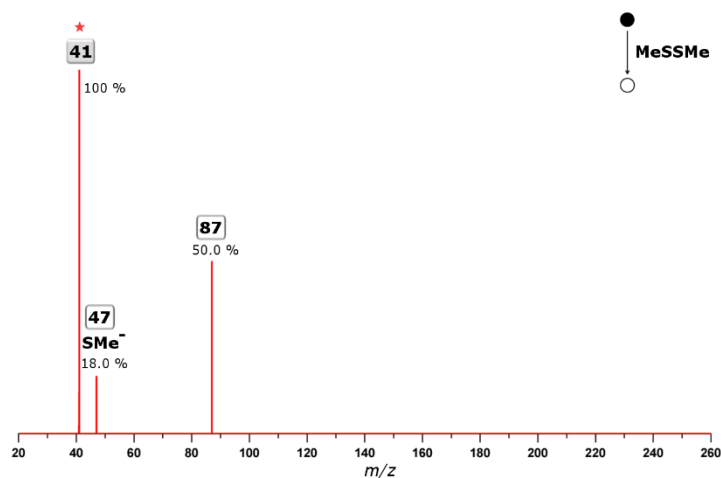

**Figure S48.** Mass spectrum of the reaction between dimethyl disulfide ( $\text{CH}_3\text{SSCH}_3$ ) and  $\text{C}_2\text{HO}^-$  ( $m/z$  41) recorded with a ToF voltage of 3kV, taken at a collision energy of 0.7 eV (CM) with reagent vapors at nominal pressures of  $3.43 \times 10^{-4}$  mBar.

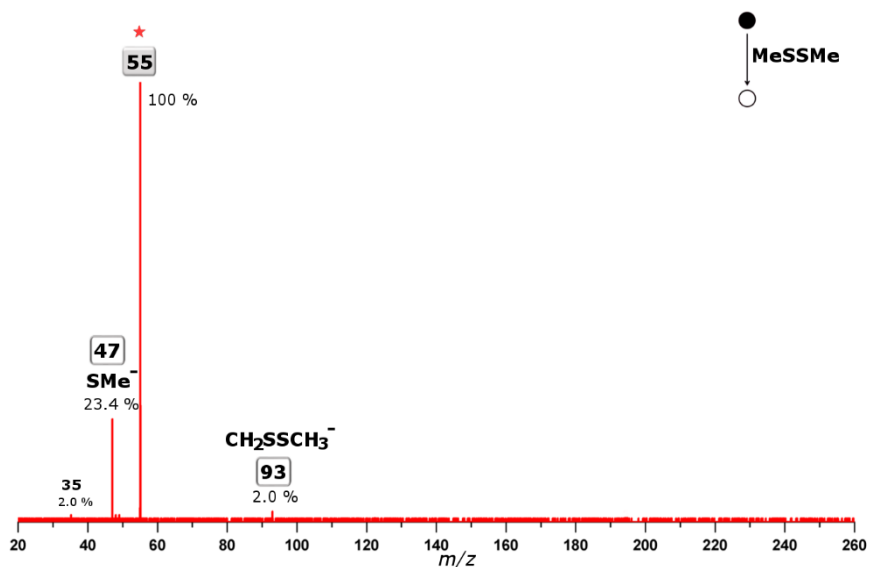

**Figure S49.** Mass spectrum of the reaction between dimethyl disulfide ( $\text{CH}_3\text{SSCH}_3$ ) and  $\text{C}_4\text{H}_7^-$  ( $m/z$  55) recorded with a ToF voltage of 3kV, taken at a collision energy of 0.63 eV (CM) with reagent vapors at nominal pressures of  $3.43 \times 10^{-4}$  mBar.

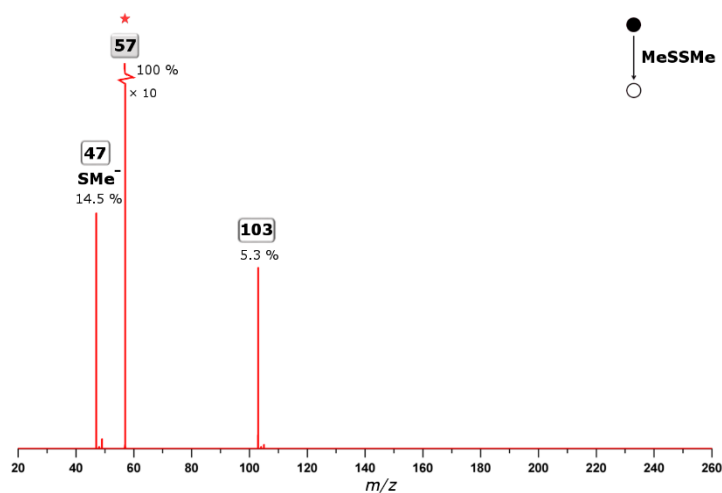

**Figure S50.** Mass spectrum of the reaction between dimethyl disulfide ( $\text{CH}_3\text{SSCH}_3$ ) and  $\text{C}_3\text{H}_5\text{O}^-$  ( $m/z$  57) recorded with a ToF voltage of 3kV, taken at a collision energy of 0.62 eV (CM) with reagent vapors at nominal pressures of  $3.43 \times 10^{-4}$  mBar.

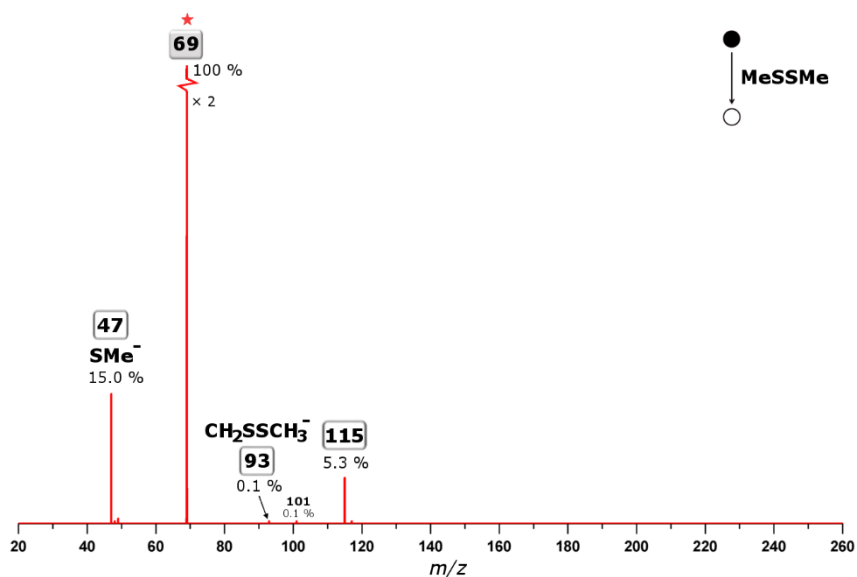

**Figure S51.** Mass spectrum of the reaction between dimethyl disulfide ( $\text{CH}_3\text{SSCH}_3$ ) and  $\text{C}_4\text{H}_5\text{O}^-$  ( $m/z$  69B) recorded with a ToF voltage of 3kV, taken at a collision energy of 0.62 eV (CM) with reagent vapors at nominal pressures of  $3.43 \times 10^{-4}$  mBar.

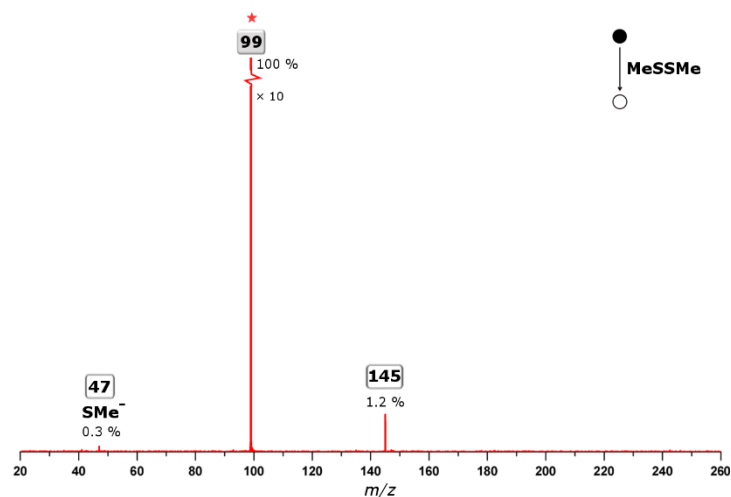

**Figure S52.** Mass spectrum of the reaction between dimethyl disulfide ( $\text{CH}_3\text{SSCH}_3$ ) and  $\text{C}_5\text{H}_6\text{O}_2^-$  ( $m/z$  99) recorded with a ToF voltage of 3kV, taken at a collision energy of 0.49 eV (CM) with reagent vapors at nominal pressures of  $3.43 \times 10^{-4}$  mBar.

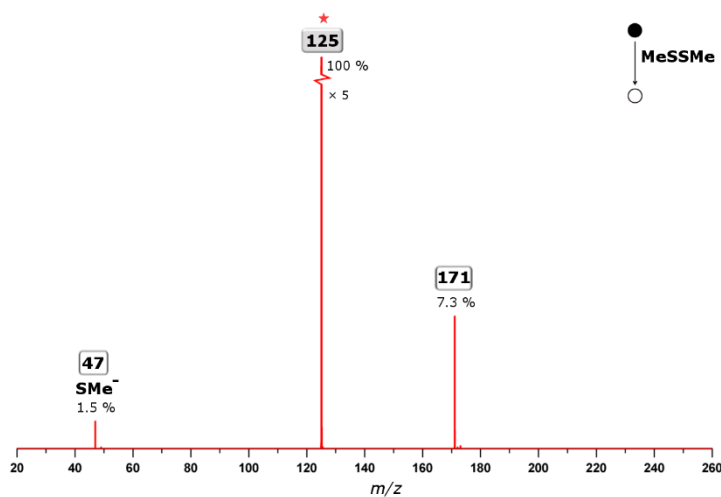

**Figure S53.** Mass spectrum of the reaction between dimethyl disulfide ( $\text{CH}_3\text{SSCH}_3$ ) and  $\text{C}_8\text{H}_{13}\text{O}^-$  ( $m/z$  125) recorded with a ToF voltage of 3kV, taken at a collision energy of 0.43 eV (CM) with reagent vapors at nominal pressures of  $3.43 \times 10^{-4}$  mBar.

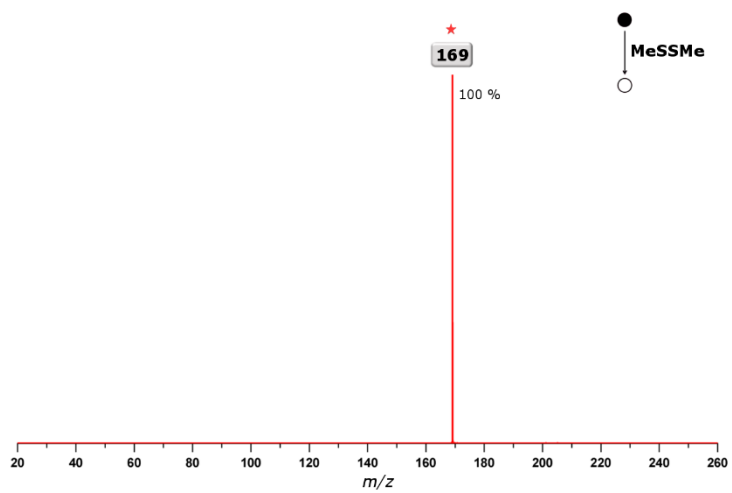

**Figure S54.** Mass spectrum of the reaction between dimethyl disulfide ( $\text{CH}_3\text{SSCH}_3$ ) and  $\text{C}_9\text{H}_{13}\text{O}_3^-$  ( $m/z$  169) recorded with a ToF voltage of 3kV, taken at a collision energy of 0.36 eV (CM) with reagent vapors at nominal pressures of  $3.43 \times 10^{-4}$  mBar. Please note the lack of the product in this reaction.



### 3.4. Reactions with methyl thiocyanate ( $\text{CH}_3\text{SCN}$ )

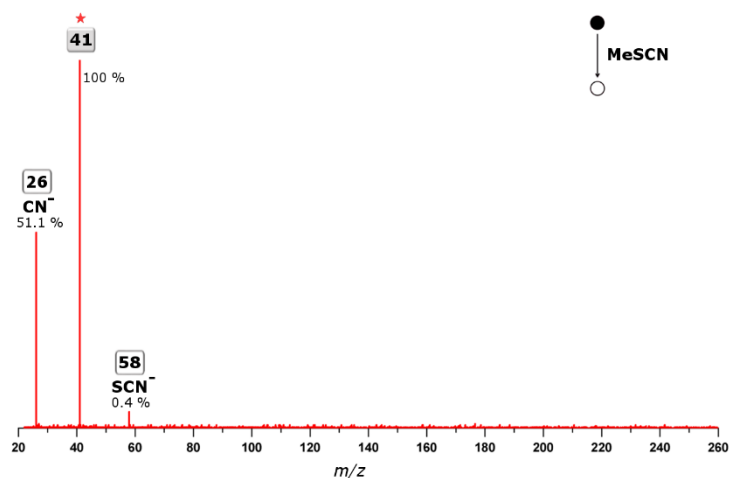

**Figure S55.** Mass spectrum of the reaction between methyl thiocyanate ( $\text{CH}_3\text{SCN}$ ) and  $\text{C}_2\text{HO}^-$  ( $m/z$  41) recorded with a ToF voltage of 3kV, taken at a collision energy of 0.64 eV (CM) with reagent vapors at nominal pressures of  $1.53 \times 10^{-4}$  mBar.

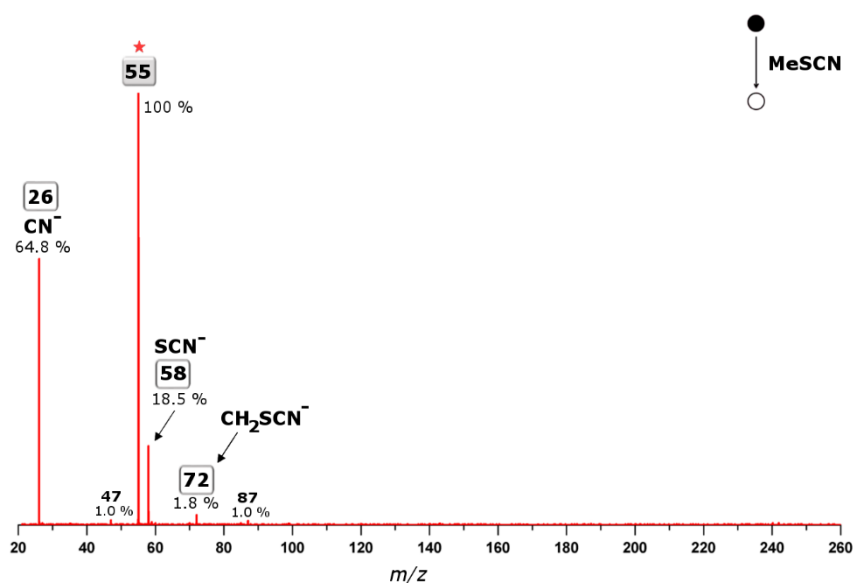

**Figure S56.** Mass spectrum of the reaction between methyl thiocyanate ( $\text{CH}_3\text{SCN}$ ) and  $\text{C}_4\text{H}_7^-$  ( $m/z$  55) recorded with a ToF voltage of 3kV, taken at a collision energy of 0.57 eV (CM) with reagent vapors at nominal pressures of  $1.53 \times 10^{-4}$  mBar.

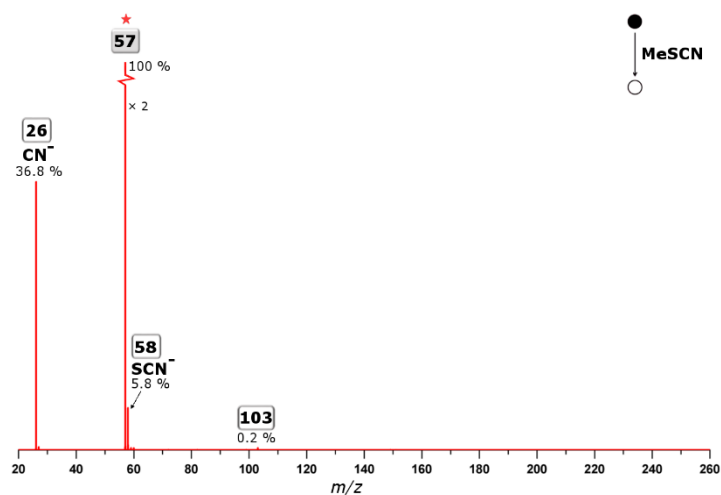

**Figure S57.** Mass spectrum of the reaction between methyl thiocyanate ( $\text{CH}_3\text{SCN}$ ) and  $\text{C}_3\text{H}_5\text{O}^-$  ( $m/z$  57) recorded with a ToF voltage of 3kV, taken at a collision energy of 0.56 eV (CM) with reagent vapors at nominal pressures of  $1.53 \times 10^{-4}$  mBar.

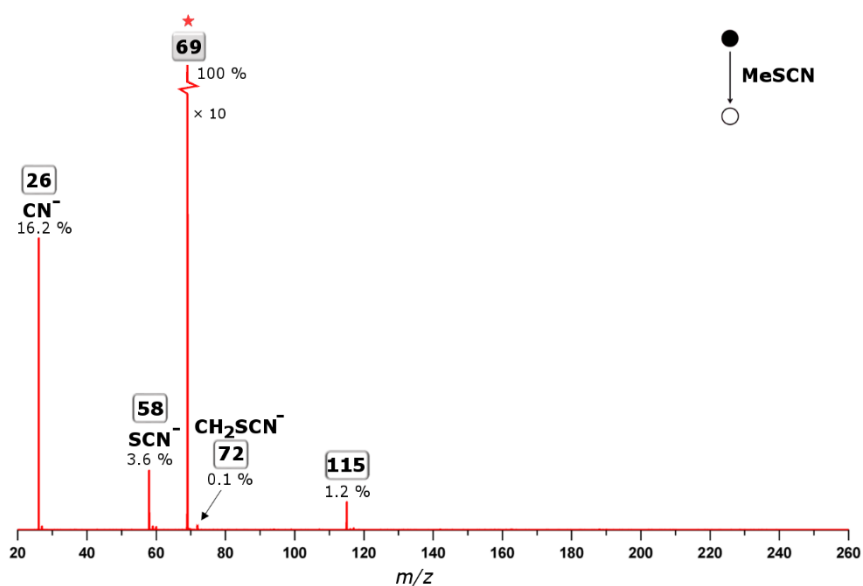

**Figure S58.** Mass spectrum of the reaction between methyl thiocyanate ( $\text{CH}_3\text{SCN}$ ) and  $\text{C}_4\text{H}_5\text{O}^-$  ( $m/z$  69B) recorded with a ToF voltage of 3kV, taken at a collision energy of 0.51 eV (CM) with reagent vapors at nominal pressures of  $1.53 \times 10^{-4}$  mBar.

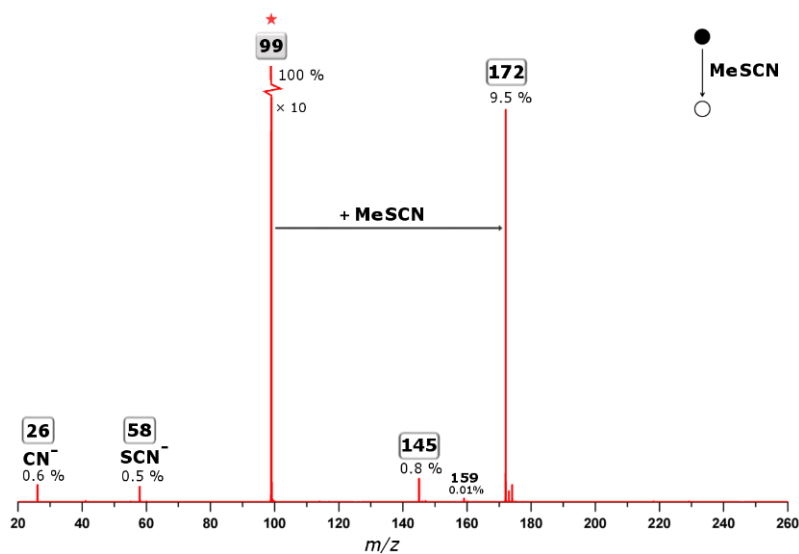

**Figure S59.** Mass spectrum of the reaction between methyl thiocyanate (CH<sub>3</sub>SCN) and C<sub>5</sub>H<sub>6</sub>O<sub>2</sub><sup>-</sup> (*m/z* 99) recorded with a ToF voltage of 3kV, taken at a collision energy of 0.42 eV (CM) with reagent vapors at nominal pressures of 1.53×10<sup>-4</sup> mBar.

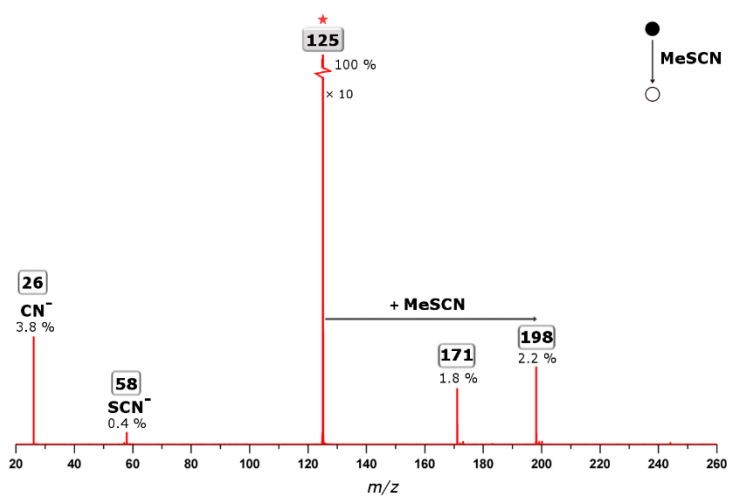

**Figure S60.** Mass spectrum of the reaction between methyl thiocyanate (CH<sub>3</sub>SCN) and C<sub>8</sub>H<sub>13</sub>O<sup>-</sup> (*m/z* 125) recorded with a ToF voltage of 3kV, taken at a collision energy of 0.37 eV (CM) with reagent vapors at nominal pressures of 1.53×10<sup>-4</sup> mBar.

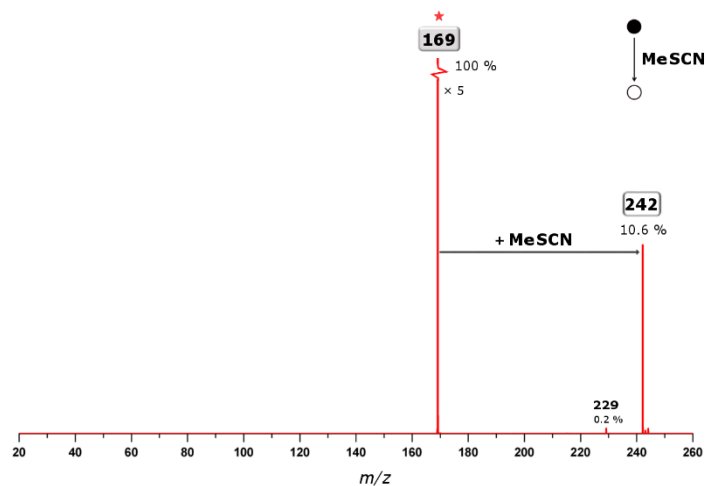

**Figure S61.** Mass spectrum of the reaction between methyl thiocyanate ( $\text{CH}_3\text{SCN}$ ) and  $\text{C}_9\text{H}_{13}\text{O}_3^-$  ( $m/z$  169) recorded with a ToF voltage of 3kV, taken at a collision energy of 0.30 eV (CM) with reagent vapors at nominal pressures of  $1.53 \times 10^{-4}$  mBar.

#### 4. Computed data for norpinonic acid

##### 4.1. Computed fragmentation pathways

**Table S8.** Calculated electron energy values in kJ/mol for fragmentation reaction of  $m/z$  169 anion.

| Structure | Theoretical method          |                           |                                  |
|-----------|-----------------------------|---------------------------|----------------------------------|
|           | CAM-B3LYP/<br>6-311+G(2d,p) | PBE1PBE/<br>6-311+G(2d,p) | $\omega$ B97XD/<br>6-311+G(2d,p) |
| TS_1      | 307                         | 300                       | 322                              |
| TS_2      | 266                         | 287                       | 301                              |
| TS_3      | 247                         | 241                       | 274                              |
| TS_4      | 176                         | 172                       | 197                              |
| TS_5      | 279                         | 290                       | 304                              |
| TS_6      | 273                         | 294                       | 304                              |
| TS_7      | 256                         | 278                       | 289                              |
| TS_8      | 170                         | 181                       | 201                              |
| TS_9      | 177                         | 164                       | 187                              |
| TS_10     | 178                         | 171                       | 198                              |
| TS_11     | 264                         | 288                       | 304                              |
| TS_12     | 302                         | 318                       | 341                              |
| TS_13     | 275                         | 285                       | 304                              |
| CX_99     | 158                         | 169                       | 187                              |
| CX_125B   | 254                         | 280                       | 288                              |
| IC_125B   | 119                         | 103                       | 143                              |
| IC_125C   | 100                         | 96                        | 120                              |
| IC_169    | 82                          | 79                        | 90                               |

**Table S9.** Calculated electron energy values and experimental values in kJ/mol for fragmentation reaction of  $m/z$  169 anion.

|                        | Theoretical method          |                           |                                  | Experimental energy |     |
|------------------------|-----------------------------|---------------------------|----------------------------------|---------------------|-----|
|                        | CAM-B3LYP/<br>6-311+G(2d,p) | PBE1PBE/<br>6-311+G(2d,p) | $\omega$ B97XD/<br>6-311+G(2d,p) |                     |     |
| Fragmentation reaction | 169 $\rightarrow$ 99        | 200                       | 236                              | 215                 | 237 |
|                        | 99 $\rightarrow$ 55         | 246                       | 246                              | 252                 | 189 |
|                        | 99 $\rightarrow$ 41         | 75                        | 67                               | 69                  | 72  |
|                        | 169 $\rightarrow$ 125       | 265                       | 272                              | 264                 | 245 |
|                        | 125 $\rightarrow$ 69        | 183                       | 185                              | 190                 | 178 |
|                        | 125 $\rightarrow$ 57        | 103                       | 93                               | 85                  | 111 |
|                        | 125 $\rightarrow$ 55        | 193                       | 197                              | 199                 | 171 |

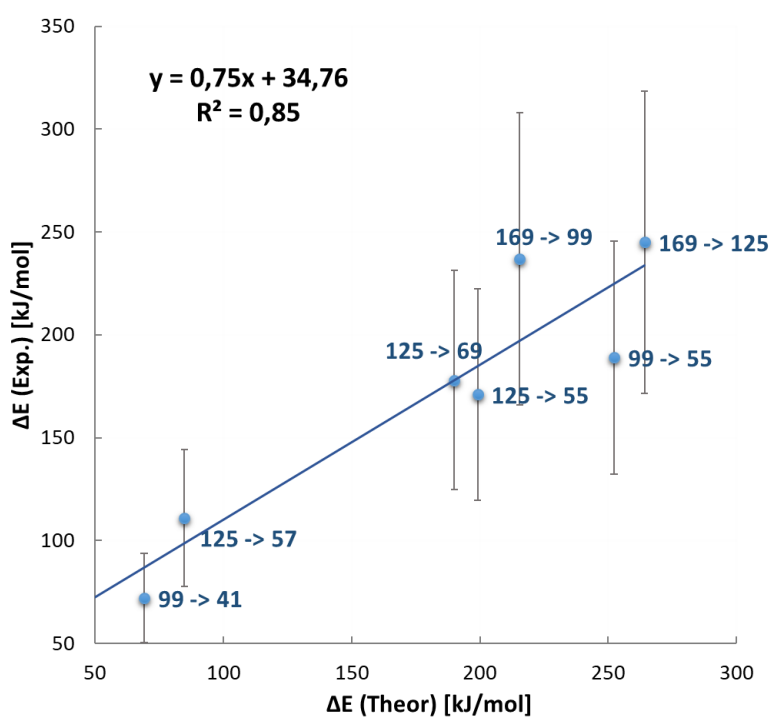

**Figure S62.** A correlation between the theoretical and the experimental results obtained with PBE1PBE/6-311+g(2d,p) level of theory. Experimental threshold energies as a function of the theoretical threshold energies (kJ/mol).

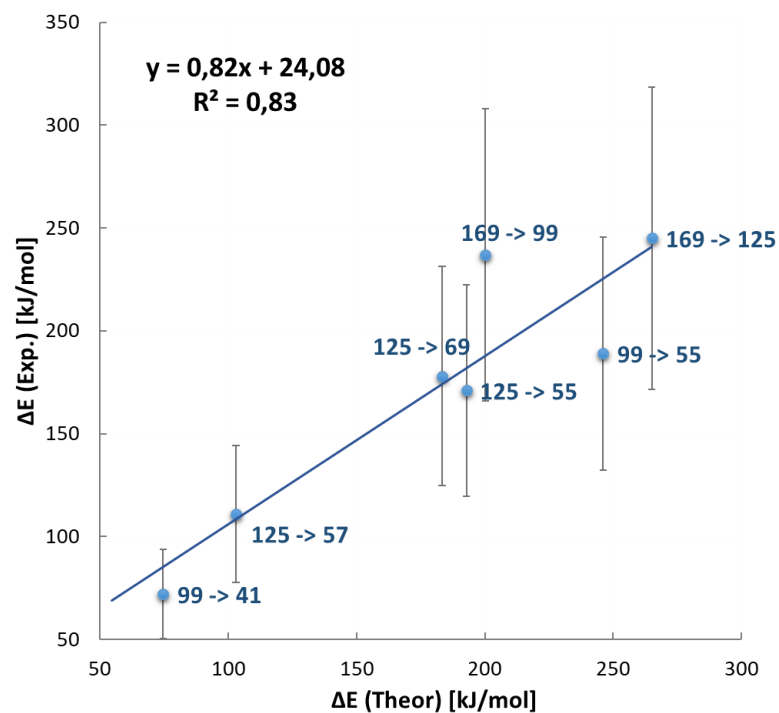

**Figure S63.** A correlation between the theoretical and the experimental results obtained with CAM-B3LYP/6-311+g(2d,p) level of theory. Experimental threshold energies as a function of the theoretical threshold energies (kJ/mol).

## 4.2. Proton affinity calculation

**Table S10.** Calculated proton affinity values in kJ/mol for anions and reagents.

| Structure                         | Theoretical method          |                           |                             |
|-----------------------------------|-----------------------------|---------------------------|-----------------------------|
|                                   | CAM-B3LYP/<br>6-311+G(2d,p) | PBE1PBE/<br>6-311+G(2d,p) | $\omega$ /<br>6-311+G(2d,p) |
| P_41                              | 1527                        | 1535                      | 1542                        |
| P_55                              | 1709                        | 1714                      | 1719                        |
| P_57                              | 1540                        | 1545                      | 1555                        |
| P_69A                             | 1611                        | 1618                      | 1621                        |
| P_69B                             | 1530                        | 1532                      | 1542                        |
| P_99A                             | 1560                        | 1545                      | 1557                        |
| P_99B                             | 1434                        | 1445                      | 1449                        |
| IC_125A                           | 1539                        | 1540                      | 1558                        |
| P_125                             | 1703                        | 1701                      | 1719                        |
| S_169                             | 1378                        | 1422                      | 1430                        |
| CH <sub>2</sub> Cl <sub>2</sub>   | 1569                        | 1578                      | 1581                        |
| CHCl <sub>3</sub>                 | 1496                        | 1501                      | 1505                        |
| CHBr <sub>3</sub>                 | 1467                        | 1465                      | 1479                        |
| CH <sub>3</sub> SSCH <sub>3</sub> | 1525                        | 1550                      | 1565                        |
| CH <sub>3</sub> SCN               | 1548                        | 1551                      | 1561                        |
| CH <sub>3</sub> NO <sub>2</sub>   | 1478                        | 1478                      | 1497                        |

## 5. Geometries

### 5.1 Anions/neutral structures/fragmentation structures

| Anions                                                                              |   |             |             |             |
|-------------------------------------------------------------------------------------|---|-------------|-------------|-------------|
| <b>P_41</b>                                                                         | C | 1.24478300  | -0.09751100 | -0.00000200 |
| 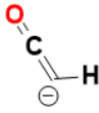   | H | 2.19261000  | 0.38814900  | 0.00000800  |
|                                                                                     | C | 0.00642700  | 0.01585900  | 0.00000500  |
|                                                                                     | O | -1.21248300 | 0.01272000  | -0.00000300 |
|                                                                                     | O | -1.21248300 | 0.01272000  | -0.00000300 |
|                                                                                     |   |             |             |             |
| <b>P_55</b>                                                                         | C | 0.24376500  | 1.55782800  | 0.00003400  |
|    | C | 0.02515300  | 0.22458800  | -0.00003900 |
|                                                                                     | H | 1.34443700  | 1.73932000  | -0.00006500 |
|                                                                                     | C | 1.08186300  | -0.87834400 | 0.00000600  |
|                                                                                     | H | 0.99449700  | -1.53854700 | 0.88110600  |
|                                                                                     | H | 0.99333700  | -1.53975800 | -0.88009400 |
|                                                                                     | H | 2.09050900  | -0.45194100 | -0.00096900 |
|                                                                                     | C | -1.38018400 | -0.35289400 | 0.00002400  |
|                                                                                     | H | -1.57067800 | -0.98994900 | -0.88219300 |
|                                                                                     | H | -1.57041200 | -0.99079200 | 0.88165500  |
|                                                                                     | H | -2.10527300 | 0.46460100  | 0.00041700  |
| <b>P_57</b>                                                                         | C | -1.19319300 | -0.77858400 | 0.00004900  |
|  | H | -1.03374800 | -1.85325400 | 0.00017500  |
|                                                                                     | H | -2.21505300 | -0.40827000 | -0.00048800 |
|                                                                                     | C | -0.13229300 | 0.10904100  | 0.00004700  |
|                                                                                     | O | -0.18258700 | 1.38160900  | 0.00001000  |
|                                                                                     | C | 1.28538000  | -0.48928900 | -0.00003900 |
|                                                                                     | H | 1.82736500  | -0.12622300 | -0.88144300 |
|                                                                                     | H | 1.82726800  | -0.12644800 | 0.88151700  |
|                                                                                     | H | 1.29549400  | -1.58568100 | -0.00019200 |
|                                                                                     |   |             |             |             |
| <b>P_69A</b>                                                                        | C | 1.96937200  | 0.35995400  | 0.00002100  |
|  | H | 2.93105200  | -0.19685000 | 0.00000500  |
|                                                                                     | C | -0.45944500 | -0.19496800 | 0.00000000  |
|                                                                                     | O | -1.36657600 | -1.04027100 | 0.00001300  |
|                                                                                     | C | -0.83760000 | 1.27643800  | -0.00000500 |
|                                                                                     | H | 0.05850300  | 1.89847100  | 0.00001300  |
|                                                                                     | H | -1.45304200 | 1.48136600  | -0.88279100 |
|                                                                                     | H | -1.45308000 | 1.48137800  | 0.88275000  |
|                                                                                     | C | 0.95550200  | -0.55665300 | -0.00002400 |
|                                                                                     | H | 1.08220100  | -1.65082600 | -0.00003100 |
|                                                                                     |   |             |             |             |
| <b>P_69B</b>                                                                        | C | 0.61300900  | -0.04131300 | 0.00319000  |
|                                                                                     | O | 1.47823900  | -0.94403900 | -0.01960700 |



|                                                                                     |       |             |             |             |
|-------------------------------------------------------------------------------------|-------|-------------|-------------|-------------|
| 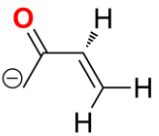   | C     | 0.81063800  | 1.30716300  | 0.01133600  |
|                                                                                     | H     | 1.82155400  | 1.70395000  | -0.00709300 |
|                                                                                     | H     | -0.02133500 | 2.01009600  | 0.03836000  |
|                                                                                     | C     | -0.79635200 | -0.56439300 | 0.02442800  |
|                                                                                     | H     | -0.80960000 | -1.65218700 | 0.07270600  |
|                                                                                     | C     | -1.94913300 | 0.09050500  | -0.01790800 |
|                                                                                     | H     | -2.89297300 | -0.43672200 | 0.00148000  |
|                                                                                     | H     | -1.99253100 | 1.17540400  | -0.07486700 |
|                                                                                     | <hr/> |             |             |             |
| <b>P_99A</b>                                                                        |       |             |             |             |
|    | C     | 0.38682800  | -0.00073600 | 1.10999500  |
|                                                                                     | C     | -0.70638800 | -0.00012400 | 0.07593600  |
|                                                                                     | H     | 0.42126000  | 0.00352900  | 2.18965400  |
|                                                                                     | C     | -1.56291600 | -1.25796600 | -0.04602200 |
|                                                                                     | H     | -2.24665600 | -1.34056600 | 0.80849500  |
|                                                                                     | H     | -2.16359700 | -1.24935100 | -0.96596100 |
|                                                                                     | H     | -0.91279200 | -2.13585300 | -0.05458700 |
|                                                                                     | C     | -1.56053000 | 1.25950500  | -0.04690800 |
|                                                                                     | H     | -2.16049900 | 1.25158200  | -0.96729700 |
|                                                                                     | H     | -2.24478700 | 1.34355900  | 0.80706400  |
|                                                                                     | H     | -0.90862500 | 2.13603400  | -0.05530000 |
|                                                                                     | C     | 1.33062400  | -0.00051800 | 0.09372100  |
|                                                                                     | O     | 0.32253900  | -0.00123100 | -0.96462700 |
|                                                                                     | O     | 2.53871000  | -0.00000700 | -0.14567400 |
|                                                                                     | <hr/> |             |             |             |
| <b>P_99B</b>                                                                        |       |             |             |             |
|  | C     | -0.08253100 | -0.68656500 | -0.00050700 |
|                                                                                     | C     | 1.12021300  | -0.09474800 | 0.00014100  |
|                                                                                     | H     | -0.11111300 | -1.77612600 | -0.00128800 |
|                                                                                     | C     | 2.38525100  | -0.91919700 | -0.00058300 |
|                                                                                     | H     | 2.17073300  | -1.99191300 | -0.00192200 |
|                                                                                     | H     | 3.00369000  | -0.69149400 | -0.88016300 |
|                                                                                     | H     | 3.00317600  | -0.69358700 | 0.87988600  |
|                                                                                     | C     | 1.34089100  | 1.39419500  | 0.00128500  |
|                                                                                     | H     | 1.92554300  | 1.69370300  | 0.88326300  |
|                                                                                     | H     | 1.92584800  | 1.69509700  | -0.88007100 |
|                                                                                     | H     | 0.37736500  | 1.90672900  | 0.00178400  |
|                                                                                     | C     | -1.48365000 | -0.06824100 | -0.00022100 |
|                                                                                     | O     | -1.59094900 | 1.18592700  | -0.00178600 |
|                                                                                     | O     | -2.40608600 | -0.92281100 | 0.00151300  |
|                                                                                     | <hr/> |             |             |             |
| <b>P_125</b>                                                                        |       |             |             |             |
|  | C     | -1.72308000 | 1.27461800  | -0.07010100 |
|                                                                                     | C     | -0.28699100 | 1.73925700  | -0.48081400 |
|                                                                                     | C     | 0.13927700  | 0.27251500  | -0.68314600 |
|                                                                                     | C     | -1.14439000 | -0.15552700 | 0.14258300  |
|                                                                                     | H     | -2.34487800 | 1.25154300  | -0.98280900 |
|                                                                                     | H     | 0.26681200  | 2.23598200  | 0.33085200  |
|                                                                                     | H     | -0.17867400 | 2.37991800  | -1.37053700 |

|   |             |             |             |
|---|-------------|-------------|-------------|
| H | -0.03582200 | -0.03900200 | -1.71828500 |
| C | -1.91696400 | -1.33237500 | -0.44144100 |
| H | -1.39773700 | -2.29057700 | -0.29786300 |
| H | -2.89844200 | -1.39806000 | 0.04665400  |
| H | -2.08782400 | -1.19137400 | -1.51426400 |
| C | -0.84646900 | -0.44511300 | 1.61887000  |
| H | -1.79909100 | -0.57786800 | 2.14351400  |
| H | -0.23090800 | -1.34733400 | 1.76535000  |
| H | -0.35208900 | 0.40747000  | 2.09280400  |
| C | 1.48021700  | -0.28821500 | -0.29767800 |
| O | 1.86613800  | -1.37887100 | -0.70637600 |
| C | 2.36516900  | 0.50894700  | 0.63901000  |
| H | 3.25780000  | -0.07026100 | 0.88373000  |
| H | 2.64971800  | 1.45139800  | 0.15887100  |
| H | 1.82141900  | 0.77449900  | 1.54929300  |

| IC_125A |             |             |             |  |
|---------|-------------|-------------|-------------|--|
| C       | -0.99836500 | -0.89971200 | -0.10591900 |  |
| C       | 0.15277700  | -0.80105900 | -1.07376800 |  |
| C       | 1.50823200  | -0.95947500 | -0.42720600 |  |
| C       | -2.03495400 | -0.08325700 | 0.07368200  |  |
| H       | -0.92010300 | -1.75238600 | 0.56634100  |  |
| H       | 0.08105900  | 0.12711400  | -1.64643800 |  |
| H       | 0.02464100  | -1.60177300 | -1.81609100 |  |
| H       | 1.91559400  | -1.96616100 | -0.38747900 |  |
| C       | -3.04633900 | -0.33321100 | 1.15938600  |  |
| H       | -3.07373800 | 0.49861900  | 1.87315700  |  |
| H       | -4.05948600 | -0.42659600 | 0.75024400  |  |
| H       | -2.81869900 | -1.24410600 | 1.71415100  |  |
| C       | -2.29945200 | 1.15644000  | -0.73360600 |  |
| H       | -3.26612800 | 1.08911000  | -1.24654700 |  |
| H       | -2.35025500 | 2.03812100  | -0.08487100 |  |
| H       | -1.53398500 | 1.33686800  | -1.48456700 |  |
| C       | 2.26804100  | 0.02559500  | 0.16475300  |  |
| O       | 3.39666700  | -0.13683200 | 0.72132100  |  |
| C       | 1.75830000  | 1.47177700  | 0.17517900  |  |
| H       | 1.68396600  | 1.80247700  | 1.21429200  |  |
| H       | 2.50381600  | 2.10659000  | -0.31146900 |  |
| H       | 0.79054400  | 1.62418900  | -0.30630400 |  |

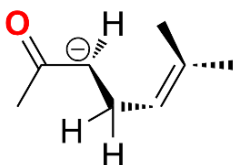

| IC_125B |             |             |             |  |
|---------|-------------|-------------|-------------|--|
| C       | -1.36203200 | 1.03394700  | -0.13722400 |  |
| C       | 0.07145800  | 1.42244000  | -0.45248000 |  |
| C       | 1.08119700  | 0.39391800  | -0.85889000 |  |
| C       | -1.96784800 | -0.13954900 | 0.03304400  |  |
| H       | -2.00961700 | 1.90826400  | -0.03088100 |  |
| H       | 0.42526100  | 1.99160700  | 0.41546200  |  |
| H       | -0.01946100 | 2.18988600  | -1.24044900 |  |

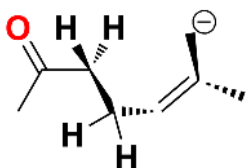

|  |   |             |             |             |
|--|---|-------------|-------------|-------------|
|  | H | 0.97359000  | -0.01487000 | -1.86138300 |
|  | C | -3.44260000 | -0.19048500 | 0.34136000  |
|  | H | -3.98254000 | -0.76471800 | -0.42041800 |
|  | H | -3.62692700 | -0.69503600 | 1.29670800  |
|  | H | -3.88381500 | 0.80651700  | 0.39220600  |
|  | C | -1.32018200 | -1.49314500 | -0.04282600 |
|  | H | -1.44163100 | -2.02176500 | 0.91001400  |
|  | H | -1.81366600 | -2.10811900 | -0.80497900 |
|  | H | -0.26063100 | -1.42007900 | -0.27444400 |
|  | C | 2.10492700  | -0.14296700 | -0.11257000 |
|  | O | 2.90357700  | -1.05183300 | -0.50313100 |
|  | C | 2.35046000  | 0.32952100  | 1.32469000  |
|  | H | 2.20369600  | -0.51984900 | 1.99793400  |
|  | H | 3.39799000  | 0.62873100  | 1.41177900  |
|  | H | 1.71685200  | 1.15201000  | 1.66288200  |

| <b>S_169</b> |   |             |             |             |
|--------------|---|-------------|-------------|-------------|
|              | C | 1.12197900  | 0.02007100  | -0.78957800 |
|              | C | 0.00096400  | -0.95644900 | -1.17254900 |
|              | C | -1.04272000 | 0.10561000  | -0.77881500 |
|              | C | 0.08658300  | 0.86845900  | 0.01460100  |
|              | H | 1.47635400  | 0.59725200  | -1.64642100 |
|              | H | 0.03819900  | -1.81573900 | -0.50454900 |
|              | H | -0.03346800 | -1.31594400 | -2.20253600 |
|              | H | -1.32732600 | 0.72502600  | -1.63190400 |
|              | C | 0.12700400  | 2.36845500  | -0.20378800 |
|              | H | -0.71673800 | 2.86413500  | 0.28604400  |
|              | H | 1.05741700  | 2.76996500  | 0.20355400  |
|              | H | 0.09210100  | 2.61214100  | -1.26833200 |
|              | C | 0.11657100  | 0.55571800  | 1.50504100  |
|              | H | 1.01913300  | 0.98785700  | 1.93879500  |
|              | H | -0.75844000 | 0.97157100  | 2.01408700  |
|              | H | 0.16585800  | -0.51666600 | 1.69526400  |
|              | C | -2.31733700 | -0.23079100 | -0.06047600 |
|              | C | 2.34901800  | -0.49417300 | -0.00982100 |
|              | O | 3.16352400  | 0.39902800  | 0.30975400  |
|              | O | -3.21895000 | 0.57955300  | 0.02216000  |
|              | O | 2.38325700  | -1.71580100 | 0.24526000  |
|              | C | -2.46727800 | -1.59713600 | 0.56026600  |
|              | H | -3.42132900 | -1.65730900 | 1.08016200  |
|              | H | -2.41668500 | -2.36132300 | -0.21904100 |
|              | H | -1.64642000 | -1.80178200 | 1.24820200  |

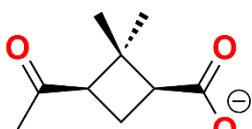

| <b>Neutral fragments</b> |   |             |             |             |
|--------------------------|---|-------------|-------------|-------------|
| <b>P_41N</b>             |   |             |             |             |
|                          | C | 0.00642700  | 0.01585900  | 0.00000500  |
|                          | O | -1.21236721 | 0.01398374  | 0.01699319  |
|                          | C | 1.20262468  | -0.09365146 | -0.00000176 |

|                                                                                     |       |             |             |             |
|-------------------------------------------------------------------------------------|-------|-------------|-------------|-------------|
| 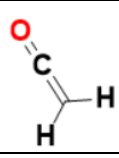   | H     | 1.64977607  | 0.87843683  | -0.00001276 |
|                                                                                     | H     | 1.51182613  | -0.62846311 | 0.87365204  |
| <hr/>                                                                               |       |             |             |             |
| <b>P_55N</b>                                                                        | C     | 0.02468900  | 0.22379100  | -0.00001300 |
|    | C     | 1.07677400  | -0.87793800 | -0.00006700 |
|                                                                                     | H     | 0.98789200  | -1.53687900 | 0.87836400  |
|                                                                                     | H     | 0.98771800  | -1.53696000 | -0.87841900 |
|                                                                                     | H     | 2.08174300  | -0.45147600 | -0.00018600 |
|                                                                                     | C     | -1.38141400 | -0.34424400 | 0.00015700  |
|                                                                                     | H     | -1.57346400 | -0.97910700 | -0.87960100 |
|                                                                                     | H     | -1.57329200 | -0.97900600 | 0.88002400  |
|                                                                                     | H     | -2.10062500 | 0.47440300  | 0.00018100  |
|                                                                                     | C     | 0.25549253  | 1.55919235  | -0.00010088 |
|                                                                                     | H     | -0.18247085 | 1.99689927  | 0.87253921  |
|                                                                                     | H     | 1.31030199  | 1.73883973  | 0.00184921  |
|                                                                                     | <hr/> |             |             |             |
| <b>P_57N</b>                                                                        | C     | -0.00530100 | 0.17565700  | -0.00006300 |
|  | O     | 0.01888100  | 1.37695300  | 0.00001200  |
|                                                                                     | C     | 1.27887300  | -0.62246700 | -0.00036700 |
|                                                                                     | H     | 1.87467900  | -0.33223100 | -0.86655200 |
|                                                                                     | H     | 1.85406700  | -0.36289300 | 0.88951900  |
|                                                                                     | H     | 1.11120700  | -1.69818900 | -0.01961800 |
|                                                                                     | C     | -1.29960500 | -0.59186100 | 0.00032000  |
|                                                                                     | H     | -1.35224900 | -1.22776100 | -0.88711200 |
|                                                                                     | H     | -1.33864300 | -1.25556800 | 0.86767200  |
|                                                                                     | H     | -2.14390900 | 0.09304200  | 0.01665800  |
|                                                                                     | <hr/> |             |             |             |
| <b>P_69N</b>                                                                        | C     | 0.60330900  | -0.05462800 | 0.03333200  |
|  | O     | 1.38490200  | -1.03163500 | -0.19398200 |
|                                                                                     | C     | -0.82685400 | -0.46160200 | 0.27541500  |
|                                                                                     | H     | -0.91419000 | -1.38893900 | 0.83889300  |
|                                                                                     | C     | -1.92752100 | 0.11394900  | -0.19480200 |
|                                                                                     | H     | -2.91352300 | -0.29634300 | 0.00370000  |
|                                                                                     | H     | -1.87418300 | 1.01203700  | -0.79992900 |
|                                                                                     | C     | 0.90405158  | 1.26541297  | 0.09343831  |
|                                                                                     | H     | 0.59370825  | 1.74351661  | -0.81210237 |
|                                                                                     | H     | 0.39570955  | 1.70959274  | 0.92361462  |
|                                                                                     | H     | 1.96018860  | 1.38536926  | 0.21625968  |
|                                                                                     | <hr/> |             |             |             |
| <b>P_99AN</b>                                                                       | C     | -0.70478600 | -0.00001500 | 0.07386900  |
|  | C     | -1.55944900 | -1.25461900 | -0.04357300 |
|                                                                                     | H     | -2.23953800 | -1.33612400 | 0.81060800  |
|                                                                                     | H     | -2.16193900 | -1.24624100 | -0.95923400 |
|                                                                                     | H     | -0.91088900 | -2.13007800 | -0.05370500 |
|                                                                                     | C     | -1.55756500 | 1.25575900  | -0.04478300 |

|                                                                                   |   |             |             |             |
|-----------------------------------------------------------------------------------|---|-------------|-------------|-------------|
| 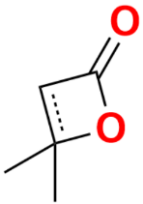 | H | -2.16041800 | 1.24722700  | -0.96020300 |
|                                                                                   | H | -2.23723500 | 1.33934100  | 0.80953700  |
|                                                                                   | H | -0.90770200 | 2.13024400  | -0.05624000 |
|                                                                                   | C | 1.33087000  | -0.00033100 | 0.09454500  |
|                                                                                   | O | 0.32146700  | -0.00133100 | -0.96605500 |
|                                                                                   | O | 2.53014900  | -0.00003000 | -0.14320000 |
|                                                                                   | C | 0.38769400  | -0.00028800 | 1.10368900  |
|                                                                                   | H | 0.43288296  | -0.87400880 | 1.71970030  |
|                                                                                   | H | 0.43273601  | 0.87329384  | 1.71990810  |

|                                                                                   |   |             |             |             |             |
|-----------------------------------------------------------------------------------|---|-------------|-------------|-------------|-------------|
| <b>P_99BN</b>                                                                     |   | C           | -0.07963900 | -0.68279700 | -0.00052400 |
| 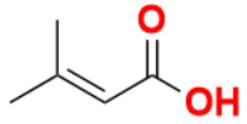 | C | 1.11525000  | -0.09423500 | -0.00003900 |             |
|                                                                                   | H | -0.10713900 | -1.76979100 | -0.00100900 |             |
|                                                                                   | C | 2.37750300  | -0.91548300 | -0.00024500 |             |
|                                                                                   | H | 2.16300800  | -1.98513100 | -0.00093700 |             |
|                                                                                   | H | 2.99419000  | -0.68811600 | -0.87779900 |             |
|                                                                                   | H | 2.99377300  | -0.68918300 | 0.87787700  |             |
|                                                                                   | C | 1.33496300  | 1.39078800  | 0.00080000  |             |
|                                                                                   | H | 1.91859900  | 1.68964200  | 0.88036700  |             |
|                                                                                   | H | 1.91927400  | 1.69053400  | -0.87801600 |             |
|                                                                                   | H | 0.37467700  | 1.90290500  | 0.00065900  |             |
|                                                                                   | C | -1.47943500 | -0.06801000 | -0.00017300 |             |
|                                                                                   | O | -2.39454300 | -0.92078300 | 0.00102900  |             |
|                                                                                   | O | -1.58954238 | 1.18556336  | -0.00104038 |             |
|                                                                                   | H | -2.51904623 | 1.42560831  | -0.00204427 |             |

|                                                                                     |            |             |             |             |             |
|-------------------------------------------------------------------------------------|------------|-------------|-------------|-------------|-------------|
| <b>P_125N</b>                                                                       |            | C           | -0.28011600 | 1.74391200  | -0.46002100 |
| 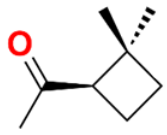 | C          | 0.13927300  | 0.28078300  | -0.68274900 |             |
|                                                                                     | C          | -1.13841100 | -0.15559700 | 0.14351000  |             |
|                                                                                     | H          | 0.28506300  | 2.23438700  | 0.34352900  |             |
|                                                                                     | H          | -0.18950100 | 2.38815800  | -1.34452800 |             |
|                                                                                     | H          | -0.03948700 | -0.01742100 | -1.71781200 |             |
|                                                                                     | C          | -1.92606700 | -1.30532700 | -0.46095600 |             |
|                                                                                     | H          | -1.41984100 | -2.27077800 | -0.34198300 |             |
|                                                                                     | H          | -2.90301300 | -1.37042900 | 0.03042300  |             |
|                                                                                     | H          | -2.10072300 | -1.13800200 | -1.52629900 |             |
|                                                                                     | C          | -0.83219800 | -0.48050000 | 1.60634900  |             |
|                                                                                     | H          | -1.77886000 | -0.62129300 | 2.13433800  |             |
|                                                                                     | H          | -0.22241500 | -1.38722200 | 1.72667400  |             |
|                                                                                     | H          | -0.33006900 | 0.35585200  | 2.09435100  |             |
|                                                                                     | C          | 1.47225000  | -0.29076400 | -0.30191200 |             |
|                                                                                     | O          | 1.84214800  | -1.38140000 | -0.70106500 |             |
|                                                                                     | C          | 2.36764200  | 0.50345900  | 0.62223500  |             |
|                                                                                     | H          | 3.25339200  | -0.08160600 | 0.86604600  |             |
|                                                                                     | H          | 2.65726200  | 1.43689400  | 0.13350400  |             |
| H                                                                                   | 1.83158500 | 0.78051500  | 1.53028100  |             |             |

|                 |   |             |             |             |
|-----------------|---|-------------|-------------|-------------|
|                 | C | -1.70813400 | 1.28085400  | -0.03165600 |
|                 | H | -2.06131974 | 1.74169394  | 0.86711337  |
|                 | H | -2.45850732 | 1.35772012  | -0.79055750 |
| <hr/>           |   |             |             |             |
| <b>IC_125AN</b> | C | -0.99836500 | -0.89971200 | -0.10591900 |
|                 | C | 0.15277700  | -0.80105900 | -1.07376800 |
|                 | C | -2.03495400 | -0.08325700 | 0.07368200  |
|                 | H | -0.92010300 | -1.75238600 | 0.56634100  |
|                 | H | 0.08105900  | 0.12711400  | -1.64643800 |
|                 | H | 0.02464100  | -1.60177300 | -1.81609100 |
|                 | C | -3.04633900 | -0.33321100 | 1.15938600  |
|                 | H | -3.07373800 | 0.49861900  | 1.87315700  |
|                 | H | -4.05948600 | -0.42659600 | 0.75024400  |
|                 | H | -2.81869900 | -1.24410600 | 1.71415100  |
|                 | C | -2.29945200 | 1.15644000  | -0.73360600 |
|                 | H | -3.26612800 | 1.08911000  | -1.24654700 |
|                 | H | -2.35025500 | 2.03812100  | -0.08487100 |
|                 | H | -1.53398500 | 1.33686800  | -1.48456700 |
|                 | C | 2.26804100  | 0.02559500  | 0.16475300  |
|                 | O | 3.39666700  | -0.13683200 | 0.72132100  |
|                 | C | 1.75830000  | 1.47177700  | 0.17517900  |
|                 | H | 1.68396600  | 1.80247700  | 1.21429200  |
|                 | H | 2.50381600  | 2.10659000  | -0.31146900 |
|                 | H | 0.79054400  | 1.62418900  | -0.30630400 |
|                 | C | 1.50823200  | -0.95947500 | -0.42720600 |
|                 | H | 1.53034391  | -1.60437696 | 0.42632345  |
|                 | H | 2.05640284  | -1.40936892 | -1.22845764 |
| <hr/>           |   |             |             |             |
| <b>IC_125BN</b> | C | -1.36203200 | 1.03394700  | -0.13722400 |
|                 | C | 0.07145800  | 1.42244000  | -0.45248000 |
|                 | C | -1.96784800 | -0.13954900 | 0.03304400  |
|                 | H | -2.00961700 | 1.90826400  | -0.03088100 |
|                 | H | 0.42526100  | 1.99160700  | 0.41546200  |
|                 | H | -0.01946100 | 2.18988600  | -1.24044900 |
|                 | C | -3.44260000 | -0.19048500 | 0.34136000  |
|                 | H | -3.98254000 | -0.76471800 | -0.42041800 |
|                 | H | -3.62692700 | -0.69503600 | 1.29670800  |
|                 | H | -3.88381500 | 0.80651700  | 0.39220600  |
|                 | C | -1.32018200 | -1.49314500 | -0.04282600 |
|                 | H | -1.44163100 | -2.02176500 | 0.91001400  |
|                 | H | -1.81366600 | -2.10811900 | -0.80497900 |
|                 | H | -0.26063100 | -1.42007900 | -0.27444400 |
|                 | C | 2.10492700  | -0.14296700 | -0.11257000 |
|                 | O | 2.90357700  | -1.05183300 | -0.50313100 |
|                 | C | 2.35046000  | 0.32952100  | 1.32469000  |
|                 | H | 2.20369600  | -0.51984900 | 1.99793400  |

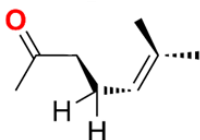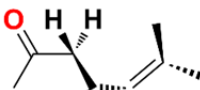

|               |   |             |             |             |
|---------------|---|-------------|-------------|-------------|
|               | H | 3.39799000  | 0.62873100  | 1.41177900  |
|               | H | 1.71685200  | 1.15201000  | 1.66288200  |
|               | C | 1.08119700  | 0.39391800  | -0.85889000 |
|               | H | 1.28846018  | 0.92973418  | -1.76157655 |
|               | H | 0.86014124  | -0.62657551 | -1.09261494 |
| <hr/>         |   |             |             |             |
| <b>S_169N</b> | C | 1.06869600  | -0.14685800 | -0.76648300 |
|               | C | -0.07856200 | -1.16918700 | -0.84959300 |
|               | C | -1.06647900 | 0.00860600  | -0.69117600 |
|               | C | 0.08265300  | 0.88552500  | -0.10202900 |
|               | H | 1.35671800  | 0.22251700  | -1.75419100 |
|               | H | -0.07932100 | -1.83580800 | 0.01469700  |
|               | H | -0.14242500 | -1.77073700 | -1.75862600 |
|               | H | -1.33987000 | 0.39663700  | -1.68210300 |
|               | C | 0.18363800  | 2.31354800  | -0.61323000 |
|               | H | -0.63894200 | 2.91669800  | -0.21757300 |
|               | H | 1.12822500  | 2.76864700  | -0.29897000 |
|               | H | 0.13894600  | 2.35065700  | -1.70647600 |
|               | C | 0.14243300  | 0.85266500  | 1.42459900  |
|               | H | 1.08279900  | 1.29187400  | 1.77238600  |
|               | H | -0.68442700 | 1.42802600  | 1.84475500  |
|               | H | 0.08026600  | -0.16508500 | 1.82190900  |
|               | C | -2.36905500 | -0.14861300 | 0.05849400  |
|               | C | 2.34050000  | -0.45019400 | -0.03276900 |
|               | O | 3.31790700  | 0.26376900  | -0.03901800 |
|               | O | -2.84971000 | 0.78280400  | 0.67510600  |
|               | O | 2.30263900  | -1.59651500 | 0.67950600  |
|               | H | 3.15971100  | -1.67873500 | 1.12844200  |
|               | C | -3.06312600 | -1.48650300 | -0.02258100 |
|               | H | -4.07129700 | -1.40417500 | 0.38358900  |
|               | H | -3.09916600 | -1.84421800 | -1.05657600 |
|               | H | -2.50210300 | -2.23069900 | 0.55258100  |

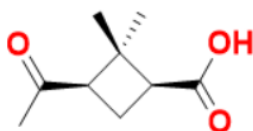

## 5.2 Products of the CID experiments

|                                                                                     |               |             |             |             |             |
|-------------------------------------------------------------------------------------|---------------|-------------|-------------|-------------|-------------|
| 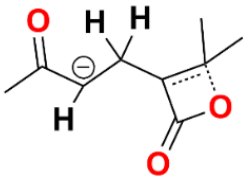   | <b>IC_169</b> | C           | 0.91118400  | -0.45462200 | -0.60549700 |
|                                                                                     | C             | -0.36076500 | -1.24471000 | -0.28481400 |             |
|                                                                                     | C             | -1.57722500 | -0.58244700 | -0.85806000 |             |
|                                                                                     | C             | 1.20173900  | 0.90575700  | 0.06676000  |             |
|                                                                                     | H             | 1.00282100  | -0.37735500 | -1.69161400 |             |
|                                                                                     | H             | -0.44274900 | -1.37410500 | 0.79517600  |             |
|                                                                                     | H             | -0.19054200 | -2.25656200 | -0.68354900 |             |
|                                                                                     | H             | -1.55383300 | -0.39795400 | -1.93098500 |             |
|                                                                                     | C             | 1.42564300  | 2.06401300  | -0.87317700 |             |
|                                                                                     | H             | 0.46774100  | 2.36920000  | -1.29742400 |             |
|                                                                                     | H             | 1.86402500  | 2.91422200  | -0.34566800 |             |
|                                                                                     | H             | 2.09295500  | 1.77873400  | -1.68787700 |             |
|                                                                                     | C             | 0.36676300  | 1.28192400  | 1.26370300  |             |
|                                                                                     | H             | 0.81394500  | 2.13825600  | 1.77393900  |             |
|                                                                                     | H             | -0.64248200 | 1.53400100  | 0.93895000  |             |
|                                                                                     | H             | 0.29899200  | 0.45676100  | 1.97087400  |             |
|                                                                                     | C             | -2.72711800 | -0.17482700 | -0.21572500 |             |
|                                                                                     | C             | 2.24075100  | -0.86027600 | -0.00896800 |             |
|                                                                                     | O             | 2.51324400  | 0.36090400  | 0.52671100  |             |
|                                                                                     | O             | -3.70665900 | 0.41003200  | -0.76879800 |             |
|                                                                                     | O             | 2.92810100  | -1.83360600 | 0.05992200  |             |
|                                                                                     | C             | -2.91302800 | -0.41707900 | 1.28679000  |             |
|                                                                                     | H             | -3.82111600 | -1.00894900 | 1.42228900  |             |
| H                                                                                   | -2.08969800   | -0.92672100 | 1.79072400  |             |             |
| H                                                                                   | -3.08522000   | 0.54542100  | 1.77641400  |             |             |
|  | <b>CX_99</b>  | C           | 1.70999700  | 0.11981700  | 0.89271600  |
|                                                                                     | C             | -1.70134500 | 0.71428000  | -0.14612100 |             |
|                                                                                     | C             | -2.99880100 | 0.87284100  | 0.09613700  |             |
|                                                                                     | C             | 2.83899600  | -0.50813000 | 0.12164100  |             |
|                                                                                     | H             | 1.35818700  | 0.03509200  | 1.90830400  |             |
|                                                                                     | H             | -1.27814900 | -0.25816800 | -0.36647800 |             |
|                                                                                     | H             | -0.97692400 | 1.52519800  | -0.13400100 |             |
|                                                                                     | H             | -3.41507200 | 1.84775800  | 0.32737500  |             |
|                                                                                     | C             | 4.23057400  | -0.41699500 | 0.72846200  |             |
|                                                                                     | H             | 4.31736900  | -1.08962600 | 1.58757200  |             |
|                                                                                     | H             | 5.00319700  | -0.69164300 | 0.00212600  |             |
|                                                                                     | H             | 4.41161600  | 0.60244400  | 1.06790400  |             |
|                                                                                     | C             | 2.59608300  | -1.87418800 | -0.49976700 |             |
|                                                                                     | H             | 3.37513500  | -2.12742000 | -1.22702400 |             |
|                                                                                     | H             | 2.58584100  | -2.64856200 | 0.27325300  |             |
|                                                                                     | H             | 1.62921100  | -1.87554500 | -1.00207000 |             |
| C                                                                                   | -3.98836000   | -0.21590200 | 0.08509600  |             |             |



|                                                                                     |   |             |             |             |
|-------------------------------------------------------------------------------------|---|-------------|-------------|-------------|
|                                                                                     | C | 1.63963400  | 1.11460100  | -0.06337500 |
|                                                                                     | O | 2.67179300  | 0.53393900  | -0.89489200 |
|                                                                                     | O | -5.16358500 | 0.00881700  | 0.31167600  |
|                                                                                     | O | 1.04742600  | 2.14645800  | -0.36751500 |
|                                                                                     | C | -3.52964400 | -1.62577700 | -0.21064300 |
|                                                                                     | H | -4.38855300 | -2.29098200 | -0.15922600 |
|                                                                                     | H | -3.07895700 | -1.68233200 | -1.20272700 |
|                                                                                     | H | -2.77076400 | -1.94321400 | 0.50597100  |
| <hr/>                                                                               |   |             |             |             |
| <b>P<sup>o</sup>_70</b>                                                             | C | 1.92426400  | 0.17849900  | -0.00018500 |
|                                                                                     | C | 0.87638900  | -0.63128100 | 0.00029500  |
|                                                                                     | H | 1.81877600  | 1.25609900  | -0.00070000 |
|                                                                                     | H | 2.93440800  | -0.21067700 | -0.00009800 |
| 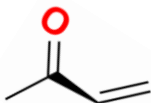   | H | 0.99772400  | -1.70856400 | 0.00078100  |
|                                                                                     | C | -0.53974600 | -0.18798800 | -0.00007100 |
|                                                                                     | O | -1.41985300 | -1.01938700 | -0.00020100 |
|                                                                                     | C | -0.85822300 | 1.28507300  | 0.00014400  |
|                                                                                     | H | -1.93775600 | 1.40978100  | 0.00033700  |
|                                                                                     | H | -0.43502400 | 1.77124100  | 0.88092400  |
|                                                                                     | H | -0.43540000 | 1.77139700  | -0.88073200 |
| <hr/>                                                                               |   |             |             |             |
| <b>IC_99</b>                                                                        | C | -0.53957400 | -0.00012200 | -0.81326000 |
|                                                                                     | C | 0.72445400  | 0.00000900  | 0.14288000  |
|                                                                                     | H | -0.46860500 | -0.00017600 | -1.89520000 |
|                                                                                     | C | 1.54826200  | -1.25702600 | -0.25544500 |
|                                                                                     | H | 1.80491800  | -1.29643600 | -1.32263100 |
|  | H | 2.47064400  | -1.26057400 | 0.33202100  |
|                                                                                     | H | 0.97158300  | -2.14566300 | 0.00557500  |
|                                                                                     | C | 1.54811400  | 1.25710300  | -0.25557000 |
|                                                                                     | H | 2.47049500  | 1.26082400  | 0.33189900  |
|                                                                                     | H | 1.80476900  | 1.29643600  | -1.32275900 |
|                                                                                     | H | 0.97132700  | 2.14569600  | 0.00535800  |
|                                                                                     | C | -1.72973000 | -0.00011400 | -0.29502900 |
|                                                                                     | O | 0.38761800  | 0.00004800  | 1.42349400  |
|                                                                                     | O | -2.80440400 | 0.00005200  | 0.16704200  |
| <hr/>                                                                               |   |             |             |             |
| <b>IC_125B</b>                                                                      | C | 0.84785200  | -0.35330100 | 0.40201800  |
|                                                                                     | C | -0.13744500 | 0.50217600  | 0.90714600  |
|                                                                                     | C | 2.08600600  | -0.07578200 | -0.11704200 |
|  | H | 0.59221300  | -1.41606100 | 0.44630800  |
|                                                                                     | H | 0.01677700  | 1.57567400  | 0.91006600  |
|                                                                                     | C | 3.08960700  | -1.15517300 | -0.38270000 |
|                                                                                     | H | 3.56043400  | -1.06429800 | -1.37502400 |
|                                                                                     | H | 3.92831200  | -1.16745100 | 0.33977000  |
|                                                                                     | H | 2.62266500  | -2.14343100 | -0.33531100 |
|                                                                                     | C | 2.57107200  | 1.33492300  | -0.22463600 |

|   |             |             |             |
|---|-------------|-------------|-------------|
| H | 2.98623900  | 1.73505400  | 0.72039500  |
| H | 3.36410300  | 1.43266700  | -0.97732100 |
| H | 1.76030600  | 2.01563500  | -0.50977900 |
| C | -2.24195000 | -0.22582800 | -0.08000400 |
| O | -2.53366800 | -1.33545900 | -0.49739900 |
| C | -2.53975500 | 0.98613200  | -0.94323800 |
| H | -1.97906800 | 0.91539100  | -1.87611300 |
| H | -3.60466900 | 0.97630500  | -1.19226900 |
| H | -2.27475200 | 1.92087300  | -0.45111200 |
| C | -1.52511800 | 0.00418000  | 1.22072900  |
| H | -1.52898900 | -0.94404600 | 1.77026700  |
| H | -2.07584500 | 0.74339800  | 1.81567200  |

| CX_125B |             |             |             |  |
|---------|-------------|-------------|-------------|--|
| C       | -1.52656200 | 0.22838400  | -0.73896500 |  |
| C       | 1.37698000  | 1.68552300  | 0.25799300  |  |
| C       | 2.56401800  | 1.09439500  | 0.17092700  |  |
| C       | -2.68933600 | -0.02070400 | -0.11871200 |  |
| H       | -1.72093400 | 0.44937900  | -1.80991000 |  |
| H       | 0.41977800  | 1.15610900  | 0.12518700  |  |
| H       | 1.32677600  | 2.76142200  | 0.40104700  |  |
| H       | 3.49357400  | 1.65464400  | 0.22617000  |  |
| C       | -4.06939200 | -0.00975800 | -0.75661000 |  |
| H       | -4.57448200 | -0.98282500 | -0.66171200 |  |
| H       | -4.73745600 | 0.72366700  | -0.28036500 |  |
| H       | -4.00298500 | 0.23389300  | -1.81836400 |  |
| C       | -2.75281300 | -0.35741700 | 1.35780500  |  |
| H       | -3.36443300 | 0.36439100  | 1.91981800  |  |
| H       | -3.20597900 | -1.34398600 | 1.53693100  |  |
| H       | -1.74890300 | -0.35996700 | 1.78267400  |  |
| C       | 2.75278800  | -0.35340100 | -0.07092100 |  |
| O       | 3.86143800  | -0.76973200 | -0.36874400 |  |
| C       | 1.57528500  | -1.26837800 | 0.07873700  |  |
| H       | 1.81438100  | -2.23475500 | -0.36318400 |  |
| H       | 1.37995800  | -1.40664500 | 1.14654900  |  |
| H       | 0.64338600  | -0.84932500 | -0.33640300 |  |

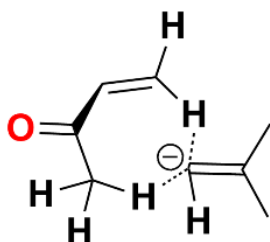

| IC_125C |             |             |             |  |
|---------|-------------|-------------|-------------|--|
| C       | -0.90564900 | -0.07593300 | -0.90452800 |  |
| C       | 0.16871700  | -1.10180300 | -0.81436900 |  |
| C       | 1.19765700  | -0.96671800 | 0.36739800  |  |
| C       | -1.96979400 | -0.03204300 | -0.01259800 |  |
| H       | -0.89811400 | 0.60393200  | -1.74946500 |  |
| H       | 0.74650500  | -1.14582300 | -1.74366000 |  |
| H       | -0.26836900 | -2.10318700 | -0.67463400 |  |
| H       | 1.79006000  | -1.88182400 | 0.43539900  |  |
| C       | -3.04579500 | 0.99752100  | -0.30487600 |  |
| H       | -3.87271000 | 0.54459600  | -0.86046600 |  |

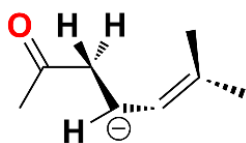

|  |   |             |             |             |
|--|---|-------------|-------------|-------------|
|  | H | -3.45788300 | 1.41167400  | 0.61913000  |
|  | H | -2.65356100 | 1.82243000  | -0.90484300 |
|  | C | -2.17610900 | -0.83920300 | 1.09437800  |
|  | H | -3.06722300 | -0.72505700 | 1.70034300  |
|  | H | -1.50893800 | -1.65224800 | 1.35237800  |
|  | H | 0.61804300  | -0.83295100 | 1.28367700  |
|  | C | 2.14145500  | 0.17702300  | 0.18346500  |
|  | O | 3.27204800  | 0.02760800  | -0.24833400 |
|  | C | 1.60061800  | 1.53784800  | 0.51127400  |
|  | H | 1.39905700  | 1.60316000  | 1.58361500  |
|  | H | 2.30233800  | 2.31555100  | 0.21165500  |
|  | H | 0.62781600  | 1.63872400  | 0.01267700  |

| <b>P<sup>o</sup>_69</b> |   |             |             |             |
|-------------------------|---|-------------|-------------|-------------|
|                         | C | 0.85592800  | -0.53275900 | -0.27176500 |
|                         | C | 2.01113500  | -0.09946300 | 0.21080500  |
|                         | C | -0.45397700 | 0.111176700 | -0.06523500 |
|                         | H | 0.84189000  | -1.45592800 | -0.84665600 |
|                         | H | 2.93630200  | -0.62373600 | 0.00884700  |
|                         | H | 2.06818700  | 0.78646500  | 0.83185600  |
|                         | C | -1.61039400 | -0.82181700 | 0.15404100  |
|                         | H | -1.44948300 | -1.43989200 | 1.04076000  |
|                         | H | -2.54554400 | -0.27713400 | 0.27731200  |
|                         | H | -1.72036100 | -1.50443600 | -0.69291400 |
|                         | C | -0.60204200 | 1.43123400  | -0.09352900 |
|                         | H | -1.56757200 | 1.89218400  | 0.07446000  |
|                         | H | 0.23267800  | 2.08869600  | -0.29957000 |

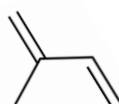

| <b>TS_1</b> |   |             |             |             |
|-------------|---|-------------|-------------|-------------|
|             | C | -1.72949000 | 1.20055800  | -0.18635200 |
|             | C | -0.29789500 | 1.71574900  | -0.42062100 |
|             | C | 0.33046800  | 0.36217900  | -0.79552300 |
|             | C | -1.35619100 | -0.13100000 | 0.18879000  |
|             | H | -2.29421500 | 1.21108700  | -1.12403700 |
|             | H | 0.16962400  | 2.15342600  | 0.47146500  |
|             | H | -0.22040400 | 2.48674500  | -1.20071500 |
|             | H | 0.00565500  | -0.00873900 | -1.76595200 |
|             | C | -2.06874000 | -1.34302100 | -0.36183300 |
|             | H | -1.35445600 | -2.16330400 | -0.48081800 |
|             | H | -2.85366400 | -1.67932400 | 0.32730900  |
|             | H | -2.52099400 | -1.12892400 | -1.33211100 |
|             | C | -0.82476400 | -0.39195500 | 1.58450500  |
|             | H | -1.67902200 | -0.59034400 | 2.24645400  |
|             | H | -0.15491400 | -1.25743200 | 1.61095100  |
|             | H | -0.30182400 | 0.47674700  | 1.98324400  |
|             | C | 1.55041000  | -0.23331700 | -0.36360800 |
|             | O | 1.96629500  | -1.32924400 | -0.79371800 |
|             | C | 2.35225800  | 0.40264900  | 0.76961000  |

|             |   |             |             |             |
|-------------|---|-------------|-------------|-------------|
|             | H | 2.60597200  | -0.36838900 | 1.50219100  |
|             | H | 3.29112300  | 0.78389500  | 0.35512800  |
|             | H | 1.84042800  | 1.22746400  | 1.26683500  |
| <hr/>       |   |             |             |             |
| <b>TS_2</b> | C | -1.27697700 | -0.14758100 | -0.03688900 |
|             | C | 1.06917100  | 1.52520900  | -0.40738400 |
|             | C | 2.11824200  | 0.79798200  | -0.81104800 |
|             | C | -2.61449500 | -0.16091200 | -0.01620800 |
|             | H | -0.87565100 | -1.00028000 | -0.62110700 |
|             | H | 0.63015500  | 1.44121900  | 0.57175800  |
|             | H | 0.59613600  | 2.23911300  | -1.07005300 |
|             | H | 2.51733500  | 0.88448400  | -1.81621800 |
|             | C | -3.50519900 | -1.19780100 | -0.68111100 |
|             | H | -4.14981800 | -1.71158700 | 0.04716900  |
|             | H | -4.18376100 | -0.74250600 | -1.41760000 |
|             | H | -2.90668500 | -1.95199900 | -1.19405500 |
|             | C | -3.41611400 | 0.90279400  | 0.70465500  |
|             | H | -4.08829100 | 1.44385300  | 0.02235400  |
|             | H | -4.05768200 | 0.47304500  | 1.48809000  |
|             | H | -2.74268200 | 1.62306900  | 1.16889100  |
|             | C | 2.75027200  | -0.22442400 | 0.01725200  |
|             | O | 3.73585400  | -0.84081400 | -0.37019800 |
|             | C | 2.12138800  | -0.52908200 | 1.35281500  |
|             | H | 2.57691500  | -1.42824100 | 1.76376800  |
|             | H | 2.28375100  | 0.30262200  | 2.04326400  |
|             | H | 1.03571600  | -0.64337800 | 1.24282600  |
| <hr/>       |   |             |             |             |
| <b>TS_3</b> | C | -1.19777000 | -0.67018400 | 0.08896100  |
|             | C | 0.12848600  | -0.07626800 | 0.05528600  |
|             | C | 1.32004000  | -0.75445300 | -0.15473900 |
|             | C | -2.41055300 | -0.07145200 | -0.28938500 |
|             | H | -1.18203100 | -1.75845300 | 0.14692800  |
|             | H | -0.72943400 | -0.34809700 | 1.30719200  |
|             | H | 0.13905600  | 1.00557500  | 0.11503200  |
|             | H | 1.29466300  | -1.81672400 | -0.37521400 |
|             | C | -3.66031000 | -0.72033300 | 0.22781600  |
|             | H | -3.89461300 | -0.43819800 | 1.27948300  |
|             | H | -4.54341000 | -0.44839300 | -0.36270500 |
|             | H | -3.58314400 | -1.81225800 | 0.21150500  |
|             | C | -2.45840600 | 1.42211100  | -0.32517600 |
|             | H | -3.41152300 | 1.78341600  | -0.72477800 |
|             | H | -2.35087200 | 1.88082700  | 0.68719800  |
|             | H | -1.66294000 | 1.85515700  | -0.94051500 |
|             | C | 2.60972700  | -0.17616200 | -0.04536900 |
|             | O | 3.66388700  | -0.80424700 | -0.23225800 |
|             | C | 2.72500600  | 1.30170900  | 0.32131600  |

|             |   |             |             |             |
|-------------|---|-------------|-------------|-------------|
|             | H | 3.77963600  | 1.57129500  | 0.31533200  |
|             | H | 2.18768100  | 1.93615300  | -0.38700100 |
|             | H | 2.30852800  | 1.49387200  | 1.31334400  |
| <hr/>       |   |             |             |             |
| <b>TS_4</b> | C | 1.15456500  | 0.06181000  | 1.08283000  |
|             | C | -0.07527700 | -0.75827600 | 1.37763300  |
|             | C | -0.99985000 | -0.91940500 | 0.15813400  |
|             | C | 1.82732600  | -0.06278400 | -0.08028900 |
|             | H | 1.43605400  | 0.83982000  | 1.78772000  |
|             | H | -0.61003800 | -0.31769300 | 2.22712000  |
|             | H | 0.20102900  | -1.77018400 | 1.70533500  |
|             | H | -1.44285800 | -1.91039000 | 0.05745800  |
|             | C | 2.88859600  | 0.93924200  | -0.45888300 |
|             | H | 3.86759900  | 0.46119300  | -0.56644700 |
|             | H | 2.65277000  | 1.39331100  | -1.42725800 |
|             | H | 2.97314300  | 1.74144600  | 0.27930800  |
|             | C | 1.44608200  | -1.07605500 | -1.04591900 |
|             | H | 1.91281600  | -0.98868400 | -2.02880300 |
|             | H | 1.47111000  | -2.10642500 | -0.68692900 |
|             | H | -0.02654000 | -0.95280900 | -0.77778400 |
|             | C | -1.94401700 | 0.09203100  | -0.20036100 |
|             | O | -2.98708700 | -0.13245300 | -0.83681900 |
|             | C | -1.61923000 | 1.54625800  | 0.10797500  |
|             | H | -1.01317000 | 1.95414700  | -0.70561900 |
|             | H | -2.55226500 | 2.10868300  | 0.15882300  |
|             | H | -1.04212800 | 1.67028600  | 1.02491900  |
| <hr/>       |   |             |             |             |
| <b>TS_5</b> | C | -1.45228500 | -0.04566300 | -0.89297500 |
|             | C | 0.93313900  | 1.44598700  | -0.30483700 |
|             | C | 2.22794200  | 1.10728800  | -0.20171800 |
|             | C | -2.52872800 | -0.04565400 | -0.10331700 |
|             | H | -1.64168900 | -0.49694800 | -1.88164900 |
|             | H | -0.17699200 | 0.66792200  | -0.50556900 |
|             | H | 0.77067900  | 2.51477400  | -0.50069800 |
|             | H | 3.05762000  | 1.81161500  | -0.30381200 |
|             | C | -3.89149300 | -0.59688500 | -0.46671100 |
|             | H | -4.20437300 | -1.39250500 | 0.22344500  |
|             | H | -4.66958000 | 0.17718800  | -0.41281100 |
|             | H | -3.89028100 | -1.00663300 | -1.47811500 |
|             | C | -2.47631800 | 0.53304000  | 1.29387700  |
|             | H | -3.21030900 | 1.33958800  | 1.42636400  |
|             | H | -2.71177500 | -0.22390100 | 2.05420900  |
|             | H | -1.48540700 | 0.93346700  | 1.50687100  |
|             | C | 2.68666100  | -0.26482000 | 0.04255400  |
|             | O | 3.87730600  | -0.55356300 | 0.02859200  |
|             | C | 1.65621300  | -1.32545000 | 0.34765300  |

|             |   |             |             |             |
|-------------|---|-------------|-------------|-------------|
|             | H | 2.09124800  | -2.30780800 | 0.16518500  |
|             | H | 1.38872700  | -1.25250000 | 1.40531800  |
|             | H | 0.73289200  | -1.18281900 | -0.21462500 |
| <hr/>       |   |             |             |             |
| <b>TS_6</b> | C | 0.15733900  | -0.82413500 | -0.76570200 |
|             | C | 1.77164900  | 0.03139000  | 0.19415000  |
|             | H | 0.70081900  | -1.72313500 | -1.07903600 |
|             | C | 1.18692400  | 1.20295500  | 0.94337800  |
|             | H | 1.98587500  | 1.73862100  | 1.46943100  |
|             | H | 0.69435600  | 1.90265700  | 0.27015100  |
|             | H | 0.45916400  | 0.86938400  | 1.68379400  |
|             | C | 2.59933800  | 0.42563000  | -1.00637700 |
|             | H | 2.89459300  | -0.45674300 | -1.57659500 |
|             | H | 2.03609900  | 1.08377200  | -1.66946000 |
|             | H | 3.51381900  | 0.94009100  | -0.68396400 |
|             | C | -2.13871200 | -0.12456700 | -0.03208900 |
|             | O | -3.23391600 | -0.44701000 | 0.43574900  |
|             | C | -1.92230500 | 1.34224200  | -0.36053000 |
|             | H | -1.02980100 | 1.49404800  | -0.96212400 |
|             | H | -2.80685700 | 1.69750200  | -0.89242700 |
|             | H | -1.84128600 | 1.91673100  | 0.56427600  |
|             | C | -1.11373000 | -1.09314400 | -0.34480100 |
|             | H | -1.48828000 | -2.11445300 | -0.23461100 |
|             | C | 2.16998000  | -1.06612300 | 0.91940700  |
|             | H | 2.77881000  | -1.84056700 | 0.46699100  |
|             | H | 1.71112100  | -1.29732000 | 1.87295300  |
| <hr/>       |   |             |             |             |
| <b>TS_7</b> | C | -1.24510300 | -0.04273400 | -0.75923700 |
|             | C | 1.64083800  | 1.85553600  | 0.36759200  |
|             | C | 2.62106800  | 0.99851800  | 0.11457000  |
|             | C | -2.44214500 | -0.05397800 | -0.16588400 |
|             | H | -1.30922500 | 0.23113400  | -1.82675700 |
|             | H | 0.61539600  | 1.51953100  | 0.48380900  |
|             | H | 1.82845000  | 2.92358200  | 0.40581400  |
|             | H | 3.63351600  | 1.34083800  | -0.08164100 |
|             | C | -3.76458000 | 0.26635300  | -0.83710800 |
|             | H | -4.46369400 | -0.58030600 | -0.78388200 |
|             | H | -4.27339900 | 1.11198300  | -0.35292900 |
|             | H | -3.61666400 | 0.51737100  | -1.88850200 |
|             | C | -2.60663200 | -0.40664700 | 1.29748900  |
|             | H | -3.05681400 | 0.41837700  | 1.86728400  |
|             | H | -3.27065600 | -1.27135800 | 1.43506700  |
|             | H | -1.64232200 | -0.64436000 | 1.74564900  |
|             | C | 2.42440200  | -0.47249000 | -0.04831400 |
|             | O | 3.24683000  | -1.08164000 | -0.73667300 |
|             | C | 1.22311200  | -1.05237600 | 0.52557800  |

|             |   |             |             |             |
|-------------|---|-------------|-------------|-------------|
|             | H | 1.22538200  | -2.13946500 | 0.45716700  |
|             | H | 1.03333600  | -0.70926600 | 1.54339800  |
|             | H | 0.21630000  | -0.61803600 | -0.07921100 |
| <hr/>       |   |             |             |             |
| <b>TS_8</b> | C | -0.97973300 | -0.01688800 | -0.88331400 |
|             | C | -0.02131400 | -1.00450600 | -0.93381900 |
|             | C | -2.12954600 | -0.03615200 | -0.02083100 |
|             | H | -0.82250700 | 0.88678200  | -1.46462500 |
|             | H | 0.73417200  | -0.96643500 | -1.70756400 |
|             | H | -0.28824200 | -2.00165700 | -0.60406700 |
|             | C | -3.13600700 | 1.06547000  | -0.25664000 |
|             | H | -3.52986200 | 1.02166700  | -1.27610200 |
|             | H | -3.97250100 | 1.00154700  | 0.44102900  |
|             | H | -2.66660700 | 2.04644200  | -0.13859600 |
|             | C | -2.36662700 | -0.93503900 | 0.95799900  |
|             | H | -3.28046600 | -0.89853200 | 1.53912400  |
|             | H | -1.65720600 | -1.71558900 | 1.20042500  |
|             | C | 2.28965100  | 0.10435200  | 0.21297200  |
|             | O | 3.21713100  | 0.12279900  | -0.62215600 |
|             | C | 1.77310800  | 1.42684000  | 0.75536100  |
|             | H | 1.62634000  | 1.39590700  | 1.83721300  |
|             | H | 2.46431000  | 2.22809300  | 0.49480400  |
|             | H | 0.79342400  | 1.62641900  | 0.30281700  |
|             | C | 1.56138200  | -1.03849100 | 0.59205600  |
|             | H | 1.97947800  | -2.00512200 | 0.33371300  |
|             | H | 0.93713000  | -0.99542900 | 1.47637700  |
| <hr/>       |   |             |             |             |
| <b>TS_9</b> | C | 1.04978200  | -0.39108900 | -0.68162800 |
|             | C | -0.09854100 | -1.38383000 | -0.68246500 |
|             | C | -1.24306300 | -0.42871100 | -0.92580900 |
|             | C | 0.53875100  | 0.83553000  | 0.04799700  |
|             | H | 1.24707100  | -0.10470300 | -1.71912000 |
|             | H | -0.17697900 | -1.88431000 | 0.28290800  |
|             | H | 0.02619300  | -2.16823300 | -1.43605300 |
|             | H | -1.20012100 | 0.12319300  | -1.86069900 |
|             | C | 0.44732900  | 2.17674600  | -0.59526000 |
|             | H | -0.60567900 | 2.45629000  | -0.68721200 |
|             | H | 0.94768900  | 2.92092700  | 0.02852700  |
|             | H | 0.90430700  | 2.18244900  | -1.58364400 |
|             | C | 0.05925600  | 0.77691600  | 1.46533600  |
|             | H | 0.73242500  | 1.37370700  | 2.08340500  |
|             | H | -0.94617600 | 1.19396600  | 1.54167600  |
|             | H | 0.05275100  | -0.23803700 | 1.85682100  |
|             | C | -2.41976500 | -0.23881900 | -0.19870200 |
|             | C | 2.39903400  | -0.47775000 | 0.00572700  |
|             | O | 2.51981700  | 0.69205600  | 0.53908400  |

|              |   |             |             |             |
|--------------|---|-------------|-------------|-------------|
|              | O | -3.25713700 | 0.65852400  | -0.45768100 |
|              | O | 3.18189600  | -1.41266500 | 0.02212700  |
|              | C | -2.73328700 | -1.10738600 | 1.01475700  |
|              | H | -2.01501700 | -1.90509800 | 1.20182800  |
|              | H | -2.80079000 | -0.47302200 | 1.90203800  |
|              | H | -3.71925900 | -1.55009300 | 0.86157000  |
| <hr/>        |   |             |             |             |
| <b>TS_10</b> | C | 0.94633200  | 0.39057300  | 0.60210500  |
|              | C | -0.96636600 | 1.19430300  | -0.41413000 |
|              | C | -2.13274400 | 1.07805400  | 0.29761100  |
|              | C | 1.72266600  | -0.83219200 | 0.14311300  |
|              | H | 0.56335400  | 0.56748500  | 1.59649600  |
|              | H | -0.79438600 | 0.58653800  | -1.29099400 |
|              | H | -0.40984500 | 2.12038700  | -0.39267400 |
|              | H | -2.35697400 | 1.79393100  | 1.08126200  |
|              | C | 2.54054900  | -1.54289300 | 1.20671600  |
|              | H | 1.88204700  | -2.09711000 | 1.88095400  |
|              | H | 3.24446800  | -2.25038200 | 0.75764000  |
|              | H | 3.10198800  | -0.81550300 | 1.79300700  |
|              | C | 1.03850200  | -1.81868900 | -0.78130800 |
|              | H | 1.76804500  | -2.49620900 | -1.23467300 |
|              | H | 0.31360100  | -2.41838800 | -0.22601400 |
|              | H | 0.51369000  | -1.29233000 | -1.57666100 |
|              | C | -3.08802900 | 0.02273700  | 0.15875000  |
|              | C | 1.93033800  | 1.16982400  | -0.06542200 |
|              | O | 2.59274200  | 0.06105300  | -0.64127200 |
|              | O | -4.11254500 | -0.04874500 | 0.84477500  |
|              | O | 2.22576200  | 2.32490900  | -0.27584600 |
|              | C | -2.84467400 | -1.06102000 | -0.88140700 |
|              | H | -3.72258400 | -1.70324000 | -0.91978000 |
|              | H | -2.65919800 | -0.63731500 | -1.87009800 |
|              | H | -1.97132400 | -1.65979200 | -0.61589000 |
| <hr/>        |   |             |             |             |
| <b>TS_11</b> | C | -0.27218600 | -0.61350000 | -0.88094500 |
|              | C | 0.83914400  | -0.08632100 | -0.18463800 |
|              | H | -0.30826800 | -1.65771200 | -1.17379100 |
|              | C | 1.86521200  | -1.02086700 | 0.40381000  |
|              | H | 1.90243900  | -1.94542700 | -0.17618800 |
|              | H | 2.86979300  | -0.59206200 | 0.47272200  |
|              | H | 1.53383400  | -1.27798100 | 1.41227200  |
|              | C | 1.33943100  | 1.31934500  | -0.39567300 |
|              | H | 1.74992800  | 1.74739300  | 0.52322700  |
|              | H | 2.14321600  | 1.28670500  | -1.14466900 |
|              | H | 0.54176500  | 1.95672000  | -0.76813600 |
|              | C | -1.30816600 | -0.06171100 | -0.01449800 |
|              | O | -0.61786100 | 0.52231400  | 0.97237200  |



|              |   |             |             |             |
|--------------|---|-------------|-------------|-------------|
|              | O | -2.53380300 | -0.11472900 | -0.06159400 |
| <b>TS_12</b> | C | 0.47683900  | 0.00000000  | -0.89937100 |
|              | C | -0.69581200 | 0.00000000  | 0.08642900  |
|              | H | 0.46325200  | 0.00000000  | -1.98596000 |
|              | C | -1.56992200 | 1.25263000  | -0.16466300 |
|              | H | -1.97927600 | 1.30025000  | -1.18291000 |
|              | H | -2.39904000 | 1.25019900  | 0.54870400  |
|              | H | -0.96430900 | 2.14192200  | 0.01673400  |
|              | C | -1.56992200 | -1.25263000 | -0.16466300 |
|              | H | -2.39904000 | -1.25019800 | 0.54870400  |
|              | H | -1.97927500 | -1.30025000 | -1.18291000 |
|              | H | -0.96430900 | -2.14192200 | 0.01673500  |
|              | C | 1.63117900  | 0.00000000  | -0.27503300 |
|              | O | -0.15027700 | 0.00000000  | 1.32693400  |
|              | O | 2.72375500  | 0.00000000  | 0.13865500  |

### 5.3 Proton transfer (PR) reaction

|                                                                                     |    |             |             |             |
|-------------------------------------------------------------------------------------|----|-------------|-------------|-------------|
| <b>CH<sub>2</sub>Cl<sub>2</sub></b>                                                 | C  | 0.00000000  | 0.00000000  | 0.76311300  |
| 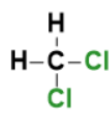   | H  | -0.89885900 | 0.00000000  | 1.37081900  |
|                                                                                     | H  | 0.89885900  | 0.00000000  | 1.37081900  |
|                                                                                     | Cl | 0.00000000  | 1.47460800  | -0.21530300 |
|                                                                                     | Cl | 0.00000000  | -1.47460800 | -0.21530300 |
| <b>CHCl<sub>2</sub></b>                                                             | C  | -0.02636900 | 0.95405500  | 0.00000000  |
|    | H  | 1.05476000  | 1.18343600  | 0.00000000  |
|                                                                                     | Cl | -0.02636900 | -0.20317000 | 1.50771100  |
|                                                                                     | Cl | -0.02636900 | -0.20317000 | -1.50771100 |
|                                                                                     |    |             |             |             |
| <b>CHCl<sub>3</sub></b>                                                             | C  | 0.00000000  | 0.00000000  | 0.45285000  |
|    | H  | 0.00000000  | 0.00000000  | 1.53642700  |
|                                                                                     | Cl | 0.00000000  | 1.68170700  | -0.08340200 |
|                                                                                     | Cl | 1.45640100  | -0.84085300 | -0.08340200 |
|                                                                                     | Cl | -1.45640100 | -0.84085300 | -0.08340200 |
|                                                                                     |    |             |             |             |
| <b>CCl<sub>3</sub></b>                                                              | C  | 0.00000000  | 0.00000000  | 0.72425900  |
|   | Cl | 0.00000000  | 1.70640500  | -0.08520700 |
|                                                                                     | Cl | 1.47779000  | -0.85320300 | -0.08520700 |
|                                                                                     | Cl | -1.47779000 | -0.85320300 | -0.08520700 |
|                                                                                     |    |             |             |             |
| <b>CHBr<sub>3</sub></b>                                                             | C  | -0.00020600 | -0.00002200 | 0.52270800  |
|  | H  | -0.00021800 | -0.00004800 | 1.60455900  |
|                                                                                     | Br | 0.43287100  | 1.79169500  | -0.04514600 |
|                                                                                     | Br | 1.33543800  | -1.27066100 | -0.04514400 |
|                                                                                     | Br | -1.76826800 | -0.52102800 | -0.04516200 |
|                                                                                     |    |             |             |             |
| <b>CBr<sub>3</sub></b>                                                              | C  | 0.00000000  | 0.00000000  | 0.81761900  |
|  | Br | 0.00000000  | 1.87698300  | -0.04672100 |
|                                                                                     | Br | -1.62551500 | -0.93849200 | -0.04672100 |
|                                                                                     | Br | 1.62551500  | -0.93849200 | -0.04672100 |
|                                                                                     |    |             |             |             |
| <b>CH<sub>3</sub>SCN</b>                                                            | C  | -1.48350600 | 0.80496100  | 0.00000400  |
|  | H  | -2.51383700 | 0.44797700  | -0.00003800 |
|                                                                                     | H  | -1.29544800 | 1.38932400  | -0.89813500 |
|                                                                                     | H  | -1.29551300 | 1.38926300  | 0.89819600  |
|                                                                                     | S  | -0.46277500 | -0.69990700 | -0.00001800 |
|                                                                                     | C  | 1.07262400  | 0.00209800  | -0.00018700 |
|                                                                                     | N  | 2.13921200  | 0.44708400  | 0.00019400  |
|                                                                                     |    |             |             |             |
| <b>CH<sub>2</sub>SCN</b>                                                            | C  | -1.69524200 | 0.69300900  | 0.00004000  |
|                                                                                     | H  | -1.67518900 | 1.29592700  | 0.91025600  |
|                                                                                     | H  | -1.67581000 | 1.29530800  | -0.91060500 |

|                                                   |   |             |             |             |
|---------------------------------------------------|---|-------------|-------------|-------------|
|                                                   | S | -0.55025900 | -0.59283600 | 0.00004700  |
|                                                   | C | 1.13319900  | -0.01565600 | -0.00016800 |
|                                                   | N | 2.21820000  | 0.40428900  | 0.00005200  |
| <hr/>                                             |   |             |             |             |
| <b>CH<sub>3</sub>SSCH<sub>3</sub></b>             | S | 0.90023900  | 0.49001000  | -0.49082300 |
|                                                   | S | -0.90024600 | 0.49002000  | 0.49081600  |
|                                                   | C | -1.84888700 | -0.78922200 | -0.37651800 |
|                                                   | H | -2.84597000 | -0.77622000 | 0.07064200  |
|                                                   | H | -1.92460200 | -0.55383000 | -1.43711900 |
|                                                   | H | -1.40732800 | -1.77493600 | -0.23300000 |
|                                                   | C | 1.84889700  | -0.78920500 | 0.37652900  |
|                                                   | H | 1.40751300  | -1.77495800 | 0.23276400  |
|                                                   | H | 2.84606700  | -0.77599500 | -0.07043000 |
|                                                   | H | 1.92436800  | -0.55397400 | 1.43718300  |
| <hr/>                                             |   |             |             |             |
| <b>CH<sub>3</sub>SSCH<sub>2</sub><sup>-</sup></b> | S | 0.97985200  | -0.13747200 | -0.00000100 |
|                                                   | C | 2.41222043  | -0.79885926 | -0.86913272 |
|                                                   | H | 2.47021033  | -0.75823899 | -1.98671794 |
|                                                   | H | 3.38215629  | -0.35335769 | -0.55106438 |
|                                                   | H | 2.62502582  | -1.86894963 | -0.64545271 |
|                                                   | C | -0.78806600 | 0.74601200  | 0.00000500  |
|                                                   | H | -0.59134407 | 1.68900827  | 0.50579855  |
|                                                   | H | -1.39627571 | 0.07828002  | 0.60662141  |
|                                                   | S | -1.58733886 | 1.04793285  | -1.55770227 |
